# Supplementary material for: Antibiotic-induced gut microbiota dysbiosis altered host metabolism
Source: Royal Society of Chemistry journal article supplement (doi:10.1039/d2mo00284a), 2023-02-28
Supplement: d2mo00284a1.xlsx [file d2mo00284a1.xlsx]

## Sheet: plasma identification C18&Amide
name	mz	RT(min)	Ctr1	Ctr2	Ctr3	Ctr4	Ctr5	Abx1	Abx2	Abx3	Abx4
Trimethylamine N-oxide	76.0754	7.325	6.35614	7.14176	6.26079	7.58513	10.4158	0.141756	0.157926	0.141756	0.141756
Pyridine	80.048	1.054	0.0139141	0.0141711	0.0147775	0.0112858	0.00996477	0.0148948	0.030509	0.0133223	0.0526047
Pyruvate	87.0035	1.89667	47.259	50.4172	47.496	45.9051	45.4578	44.1128	160.569	48.8304	49.9853
Morpholine	88.0749	1.058	0.0171822	0.0195417	0.0173003	0.0158955	0.013541	0.0113383	0.0260025	0.00903938	0.0338956
DL-lactate	89.0244	5.61	774.461	17.3097	24.1483	728.924	16.3822	742.984	2.2842	25.9246	863.946
Uracil	111.02	1.61	5.50423	0.202447	12.0605	0.202447	11.325	12.3013	13.2053	0.202447	0.202447
Histamine	112.087	0.518	0.00582405	0.00709691	0.00652315	0.00773909	0.00494039	0.00343832	0.00216775	0.00524502	0.00487764
Creatinine	114.066	2.785	11.984	11.7355	15.9992	8.25022	8.44436	10.3934	12.2196	8.95127	6.12793
2-Hydroxy-3-methylbutyric acid	117.056	2.76333	60.4942	68.5832	61.9611	60.593	63.0846	111.943	87.4966	76.5382	87.5713
L-Threonine	118.051	8.20667	18.3928	17.1395	14.9187	17.9262	18.0577	12.6939	10.3065	14.9384	12.2292
Glycine-Betaine	118.084	14.26	0.02628	0.0253685	0.0239328	0.0137193	0.0215578	0.0260681	0.0127964	0.0298	0.0192735
Betaine	118.086	5.99167	65.5211	59.7433	41.3305	56.3524	55.8566	55.671	52.5075	41.1372	51.9948
Phenethylamine	122.097	1.701	0.00808442	0.011786	0.0091871	0.00699303	0.0084787	0.00693409	0.0160525	0.00816492	0.0106246
N-benzoyl glycine	123.055	0.808	0.00936333	0.00871757	0.00848109	0.00881543	0.00917812	0.0021549	0.00165876	0.000759404	0.00183907
Taurine	126.022	7.07833	7.09106	6.28602	6.14234	4.83166	6.13392	5.67412	0.141756	4.94825	5.83159
Thymine	127.049	1.402	0.0210386	0.0195052	0.0194054	0.00451401	0.0159204	0.0187122	0.0131709	0.0155191	0.0112614
D-Glutamine	127.051	8.725	21.8676	25.5596	15.8674	17.319	21.1079	21.8407	18.2922	20.3333	19.5377
L-Pyroglutamic acid	128.035	7.47167	0.202447	8.47968	0.202447	0.202447	8.47996	11.5255	24.3079	7.84404	7.91431
L-Pipecolic acid	130.086	10.9583	6.12553	4.05734	0.141756	4.55175	2.32381	4.41228	1.41143	0.141756	3.67121
Creatine	132.077	8.00833	55.9152	57.551	38.6883	39.5831	43.0249	53.3366	52.1123	42.2427	58.2432
L-Malic acid	133.014	0.601667	12.0573	14.0762	15.1733	14.869	20.3921	21.0856	10.5023	15.9391	24.0021
L-Threonate	135.03	8.19833	0.202447	10.9641	8.38819	7.72672	8.12048	18.1603	25.3475	8.74885	10.2309
3-hydroxy-1,2-dimethylpyridin-4(1H)-one	140.068	0.576	0.0512924	0.0574449	0.0349078	0.0449032	0.0253521	0.0337186	0.0428838	0.0336341	0.021005
Isobutyrylglycine	144.067	1.28333	1.64293	1.79159	0.024522	1.08929	0.024522	3.33877	0.024522	1.51864	0.024522
(2R)-6-methylpiperidine-2-carboxylic acid	144.101	0.6	0.0558779	0.0628362	0.0668166	0.0586814	0.0255177	0.0401816	0.0468551	0.055987	0.0673986
Adipic acid	145.049	1.941	2.0762	2.07583	2.25794	2.57459	3.78371	1.64179	12.1368	2.59639	2.18794
L-Lysine	145.098	10.955	65.4683	75.5327	56.8395	58.6965	66.6	57.376	50.1317	65.0678	60.1437
L-Glutamate	146.046	10.1133	12.2065	19.123	17.6324	16.4696	21.5798	18.2518	14.411	15.788	24.4202
Acetylcholine	146.118	8.60333	0.141756	0.141756	0.141756	0.141756	0.141756	1.36464	0.141756	0.141756	0.141756
L-Glutamine	147.076	8.72667	32.5523	29.802	23.8742	26.7999	29.6204	22.9392	25.4472	21.1111	28.5694
L-Methionine	148.044	6.43	12.604	11.9402	12.2848	11.0531	11.5515	8.79173	0.202447	13.5251	7.04091
Allantoin	157.037	3.30833	206.383	244.308	192.255	187.258	223.129	291.939	244.837	164.919	167.275
Pelargonic acid	157.124	0.928333	20.5684	21.0765	20.1853	23.1025	19.0331	15.7908	115.322	12.9669	18.2747
2-Oxoadipic acid	159.03	0.816667	0.024522	1.51868	2.55518	2.79671	2.98372	0.024522	0.024522	0.024522	0.024522
3-Hydorxy-3-methylglutaric acid	161.046	0.893333	4.02324	3.74065	3.42337	4.09959	3.28918	4.70465	4.64052	6.12402	2.76024
Carnitine	162.112	0.594	0.294505	0.363813	0.33313	0.249205	0.343159	0.191639	0.513887	0.253624	0.23973
L-Carnitine	162.113	8.03833	103.09	114.378	77.4671	80.9519	112.702	120.602	95.1241	68.5165	141.137
trans-4-Coumaric acid	165.054	3.881	0.00267417	0.00209668	0.0023537	0.0034314	0.00156845	0.0127078	0.006314	0.00713114	0.0120729
Phenylalanine	166.085	1.237	0.463973	0.4741	0.397521	0.404623	0.424439	0.399059	0.433467	0.0610709	0.412447
L-Phenylalanine	166.086	5.62	16.6563	18.4066	14.4457	12.6649	16.7861	19.7349	14.6393	14.9057	19.1079
Uric acid	167.021	8.155	207.764	232.172	216.453	210.131	231.727	203.062	212.429	208.287	229.397
Hexanoylglycine	172.098	3.12	28.3833	30.7262	13.155	15.2722	12.5925	35.9481	5.13621	18.8001	0.202447
Suberic acid	173.085	3.85167	2.60461	2.81612	2.5373	2.66606	3.0036	4.07086	22.0011	3.81155	2.75844
L-Arginine	175.119	10.6883	68.4453	78.6706	34.6223	73.6611	60.2175	77.9523	39.9063	27.7917	70.3742
L-Citrulline	176.103	9.14833	4.58009	5.21068	4.73918	5.06994	0.141756	5.10756	0.141756	0.141756	5.05829
L-Tyrosine	180.067	0.848333	16.3665	19.2614	18.4433	17.1059	22.7193	14.8823	14.78	13.3854	17.2191
Hydroxyphenyllactic acid	181.051	2.32167	3.10168	3.46198	3.43958	3.76086	3.44548	5.03334	2.54955	2.26981	2.61549
4-Pyridoxic acid	182.046	1.40333	0.202447	4.47122	0.202447	0.202447	0.202447	13.7391	0.202447	0.202447	7.5173
Tyrosine	182.082	0.857	0.185503	0.242273	0.17279	0.176644	0.194098	0.15889	0.14468	0.15054	0.165794
Azelaic acid	187.098	3.145	0.202447	0.202447	0.202447	0.202447	3.21958	2.74634	386.44	0.202447	8.11496
3-Indolepropionic acid	190.085	5.794	0.0459234	0.0640658	0.0442331	0.0527223	0.0525271	0.0387529	0.0523587	0.0598477	0.0554542
Isocitrate	191.02	10.8467	0.024522	0.663157	0.024522	0.024522	0.024522	1.46809	0.024522	1.17627	1.0915
(2-oxo-2,3-dihydro-1H-indol-3-yl)acetic acid	192.066	3.519	0.0035618	0.00419632	0.00402725	0.0039986	0.00325321	0.00975696	0.00640013	0.00388818	0.00506399
Phenylacetylglycine	192.067	3.48167	0.202447	16.8193	0.202447	0.202447	12.2275	49.5005	0.202447	0.202447	25.8577
D-gluconate	195.052	8.95667	6.87859	10.026	0.202447	0.202447	0.202447	23.4662	10886.7	8.38485	0.202447
Sebacic acid	201.114	2.17667	0.202447	0.202447	0.202447	0.202447	0.202447	9.69979	110.214	0.202447	1.66267
Theophylline	203.053	0.582	2.47732	3.16564	2.53763	2.1957	2.30687	2.03043	1.90138	1.91091	2.24208
L-Tryptophan	203.083	5.66833	178.802	219.884	194.272	202.393	251.118	141.803	185.122	200.328	196.267
Indolelactic acid	204.065	2.365	12.8708	14.2725	16.2314	14.0622	11.9656	36.5911	50.7003	15.7487	25.0746
Acetylcarnitine	204.123	6.92167	221.346	286.722	267.311	238.309	307.437	342.417	278.281	210.258	273.095
Tryptophan	205.097	2.279	0.863602	0.891176	0.773059	0.767015	0.90666	0.604716	0.694197	0.742271	0.736375
N-acetylphenylalanine	208.096	3.89	0.00642363	0.00658138	0.0063551	0.00499648	0.0074126	0.00975778	0.00736329	0.00849771	0.00712468
Angelicin	209.023	4.137	0.00451043	0.00652312	0.00589967	0.00445753	0.00650561	0.00377067	0.0116936	0.00509898	0.00426251
L-kynurenine	209.093	1.267	0.0176045	0.0208058	0.0154935	0.0142552	0.0183756	0.0220168	0.0208657	0.0145526	0.0206404
Indoxyl sulfate	212.002	0.958333	146.955	240.228	147.416	176.637	227.783	309.324	244.939	161.206	266.551
Citric acid	215.016	0.781	0.0594922	0.068113	0.06232	0.0650351	0.0620202	0.152679	0.0589011	0.0876899	0.0988138
1,2,3,4-tetrahydro-6-methoxy-1-oxo-beta-carboline	217.106	14.358	0.0992237	0.0874976	0.0906917	0.0707439	0.0827137	0.0704249	0.106637	0.108789	0.0895117
Pantothenate	218.104	6.00833	8.18043	6.91635	8.92944	8.35421	0.202447	0.202447	0.202447	0.202447	0.202447
Propionylcarnitine	218.138	0.982	0.0762118	0.124515	0.079665	0.0746868	0.162064	0.0723738	0.0580854	0.0562525	0.111704
2-(4-Morpholinyl)benzothiazole	221.074	5.531	0.0209701	0.0225006	0.0192711	0.0110105	0.0137147	0.0115721	0.0253787	0.0190231	0.0237305
Myristic acid	227.202	0.878333	70.6765	96.1452	75.0263	81.9866	47.2196	93.5814	172.847	85.4433	70.1457
N,N-Dimethyldodecylamine N-oxide	230.248	6.59	0.229623	0.236731	0.195389	0.198129	0.193631	0.21301	0.383855	0.191759	0.168324
(4R,4aS,6R)-6-isopropenyl-4,4a-dimethyl-4,4a,5,6,7,8-hexahydro-2(3H)-naphthalenone	241.157	0.931	0.00765187	0.00814278	0.00543132	0.00477133	0.00580215	0.0139609	0.00853264	0.00840477	0.0111212
Pseudouridine	243.063	5.20833	0.202447	0.202447	0.202447	0.202447	0.202447	10.6095	0.202447	0.202447	3.23291
Thymidine	243.096	1.388	0.0134806	0.0126818	0.0126098	0.013171	0.00988077	0.0124453	0.00756557	0.010675	0.00747205
N-Acetyltryptophan	247.108	4.158	0.0177152	0.0228294	0.0181246	0.0185605	0.0248417	0.0349495	0.0271784	0.0227122	0.0247935
Lauryl diethanolamide	247.144	2.827	0.014281	0.0174351	0.00576643	0.0146349	0.00403421	0.00936882	0.0296058	0.00684348	0.0034176
Cordycepin	252.109	0.586	0.00240393	0.00115352	0.00295928	0.00207814	0.000851262	0.000781213	0.00123853	0.0011276	0.000834047
cis-9-Palmitoleic acid	253.218	10.0533	66.2701	80.3726	79.3874	99.5334	45.8758	87.472	101.997	101.574	79.3261
Palmitic acid	255.233	4.31167	11.8387	11.9205	5.3584	1.73217	5.59768	2.66427	0.202447	0.202447	0.202447
Glycerophosphocholine	258.11	8.89833	206.78	185.502	141.453	102.561	126.478	199.454	167.905	100.234	175.279
gamma-Glutamylleucine	261.143	2.174	0.00781701	0.00807958	0.00589868	0.00595985	0.00685128	0.00941313	0.00810849	0.000716034	0.00677912
Indarubicin	263.08	6.992	2.72108e-05	1.97521e-05	0.00121116	0.00240685	0.00217419	0.000410301	0.00126854	0.000408025	0.000291283
Phenylacetylglutamine	265.118	3.091	0.000150129	0.00148239	0.000849203	0.000442458	0.000646119	0.001633	0.0010793	0.000994836	0.00122393
7-prenyl-theophylline	271.114	4.229	3.0964e-05	0.00125623	7.95506e-05	0.000351456	0.00017849	0.000695871	0.0114743	0.00115681	0.00139943
16-Hydroxypalmitic acid	271.228	0.973333	47.8075	55.5592	45.0999	50.2207	35.7408	46.2055	12.6115	52.2343	48.8897
Dibutyl phthalate	279.157	0.7	0.157086	0.159109	0.131544	0.110422	0.066224	0.106619	0.0943498	0.14602	0.148206
Linoleic acid	279.233	0.89	2104.36	2671.08	2286.38	2550.61	1933.64	2363.66	3455.41	3097.95	2520.77
Chaulmoogric Acid	281.247	10.302	0.107786	0.15106	0.112725	0.129763	0.102459	0.129784	0.156093	0.143527	0.12269
Oleic acid	281.249	8.862	2513.61	2919.55	2770.48	2997.66	2102.5	2713.88	3988.78	3153.84	2745.87
Stearic acid	283.264	0.885	713.005	896.118	678.675	742.294	807.752	791.321	2033.13	0.202447	781.939
Piperine	286.144	7.206	0.000165141	0.000441458	2.68483e-05	2.58885e-05	8.15725e-05	3.11829e-05	0.000527254	3.71736e-05	0.000251481
Lauroylcarnitine	288.251	7.413	0.076802	0.0851106	0.0564571	0.0640082	0.0509772	0.0924671	0.0588593	0.0794409	0.069282
brevicarine	290.159	1.514	0.0168913	0.0171063	0.0137841	0.013757	0.0127479	0.0232608	0.0114717	0.00806756	0.0139427
Ethylenediaminetetraacetic acid EDTA	293.097	0.617	0.000194229	0.0015219	0.000897928	0.00120735	0.000618659	0.000219101	0.067884	0.000631066	0.000497534
EDTA	293.098	11.4817	0.141756	0.141756	0.141756	0.141756	0.141756	0.141756	0.141756	10.8547	0.141756
gamma-L-Glutamyl-L-phenylalanine	293.115	2.805	0.024522	0.024522	1.94659	0.024522	0.024522	3.55928	0.024522	1.91848	0.024522
6-Tuliposide A	294.12	6.95833	9.51731	13.8238	9.6091	13.1275	14.0973	11.4981	0.202447	0.202447	10.5547
(S)-3-amino-4-(((S)-1-methoxy-1-oxo-3-phenylpropan-2-yl)amino)-4-oxobutanoic acid	295.13	2.809	0.0137499	0.0142165	0.0113399	0.0124634	0.0120364	0.0189592	0.0133667	0.0131869	0.014006
Disulfiram	297.059	8.319	0.0027314	0.00255987	0.002655	0.00365028	0.000884375	0.00174378	0.00509766	0.00164803	0.00158668
Phloretin	297.073	5.84	0.0012592	0.00124142	0.00170039	0.00157214	0.000618659	0.000914151	0.00112368	0.000648768	0.000334704
(R)-10-Hydroxystearate	299.259	9.19333	9.82085	12.5167	10.7713	0.024522	8.4266	9.85476	0.024522	8.4928	10.2339
Eicosapentaenoic acid	303.232	0.896667	56.5732	42.2297	48.9919	0.141756	45.3108	47.4942	0.141756	0.141756	0.141756
Arachidonic Acid (peroxide free)	303.233	0.856667	730.794	886.758	750.297	881.579	764.157	791.009	991.955	1089.3	973.671
Miltirone	305.158	2.954	0.0132151	0.0166372	0.00858152	0.0099302	0.0166666	0.0151311	0.0113033	0.0116539	0.0112424
cis-8,11,14-Eicosatrienoic acid	305.248	10.655	0.024522	0.024522	0.024522	0.024522	0.024522	0.024522	0.024522	24.7733	21.4046
cis-11.14-Eicosadienoic acid	307.264	11.0417	4.63872	5.03899	3.59157	6.38224	0.024522	5.86362	5.91394	6.36135	5.74457
trans-11-Eicosenoic acid	309.28	0.85	96.8215	78.0427	85.9396	113.298	47.9645	88.2331	108.783	81.0946	71.1613
8,9-epoxy-3,10-diisobutyryloxythymol	321.175	6.399	0.00963919	0.0202143	0.0127748	0.0119903	0.0104405	0.0125175	0.0155684	0.0136498	0.0136062
Sclareol	331.261	4.678	0.00585126	0.0053854	0.000332124	0.000975134	0.000561316	0.00129901	0.0358729	0.000583272	0.000106744
Ceratodictyol	331.284	10.012	0.116213	0.150362	0.143807	0.116594	0.131687	0.0894169	0.0831704	0.0955008	0.0995474
Cirsimaritin	337.077	7.83	0.00786017	0.00782083	0.00878438	0.00740333	0.00613328	0.00577376	0.0172023	0.00692934	0.00605905
Erucamide	338.342	0.845	559.753	718.895	977.896	442.105	689.085	570.375	655.049	407.11	601.425
Bergamottin	339.149	4.366	0.0100474	0.0106187	0.00898723	0.00707227	0.00990097	0.00900365	0.0114221	0.00980941	0.0139318
Picrinine	339.176	7.506	0.0283377	0.0299816	0.0290897	0.0241242	0.0297376	0.0260065	0.0241375	0.0258436	0.0342801
5-(1,2,4a,5-tetramethyl-7-oxo-3,4,8,8a-tetrahydro-2H-naphthalen-1-yl)-3-methylpentanoic acid	343.22	8.672	0.00141684	0.00350796	0.00366629	0.002632	0.00250452	0.00231738	0.00205942	0.00920047	0.0122221
CocamidoprpylBetaine	343.296	6.545	0.00580904	0.0123648	0.00832298	0.00744334	0.0102789	0.00791471	0.0681358	0.00821094	0.00850963
Lansoprazole	344.278	7.022	1.78278e-05	4.1956e-07	0.000134242	0.000362439	0.00015103	0.000127193	4.1956e-07	0.00041776	0.00050658
Guanosine cyclic monophosphate	346.054	0.274	0.00392492	0.00390597	0.00546314	0.00412019	0.00444853	0.00481119	0.00632574	0.00394129	0.00344384
Calycanthine	347.219	6.442	0.00977337	0.00541404	0.0142286	0.0135922	0.00934611	0.0177135	0.00850784	0.0142552	0.0123524
Corticosterone	347.22	5.994	0.176111	0.189966	0.147205	0.149318	0.169952	0.14544	0.133831	0.201614	0.16255
(E)-4-[(1R,2S,3S,4R,8aS)-2,3,4-trihydroxy-2,5,5,8a-tetramethyl-3,4,4a,6,7,8-hexahydro-1H-naphthalen-1-yl]but-3-en-2-one	349.183	3.242	0.015452	0.0161285	0.0102451	0.0129929	0.0227248	0.0179589	0.00920476	0.012439	0.0103659
Tetrahydrocorticosterone	349.236	10.865	0.024522	0.024522	0.024522	0.024522	0.024522	5.13236	0.024522	5.11238	5.25684
Monoolein	357.301	10.341	0.119007	0.0568533	0.0761588	0.0801665	0.0715205	0.143957	0.0656849	0.0776096	0.0851615
1-Monostearin	359.315	11.026	0.866822	0.939095	0.91517	0.847765	0.906289	0.752794	0.692236	0.721814	0.735298
1-Stearoyl-sn-glycerol	359.315	0.86	159.375	172.399	197.001	95.837	147.762	198.248	139.951	103.886	184.963
Cortisone	361.2	5.371	0.00113253	0.00152585	0.000355989	0.00033812	0.00220407	0.000432457	0.000783051	0.000362	0.000259622
Hydrocortisone	363.217	5.31	0.000522635	0.00038714	0.0004425	0.000327137	4.03824e-06	0.00206299	0.00235568	0.00132055	0.00116966
L-5-Oxoproline	370.084	5.072	0.0227586	0.0309218	0.0234436	0.0207955	0.0270045	0.0277241	0.0435285	0.0275386	0.027396
Isosinensetin	373.126	7.256	0.000908278	0.0158984	0.000431562	0.000331844	0.000169606	0.000986364	0.00114717	0.000289423	0.000279523
Corynoxeine	383.204	8.932	0.00817075	0.00557107	0.00798688	0.00587277	0.00511322	0.0029435	0.00562883	0.00279776	0.00373422
Eudesmin	387.176	6.787	0.0155008	0.0175724	0.0146333	0.0138943	0.0146604	0.0150457	0.0165915	0.0160785	0.0134823
Licoflavone B	391.196	5.905	0.00467557	0.00448964	0.00425496	0.00338904	0.00353992	0.00347935	0.00654239	0.0032996	0.00377311
Palmitoylcarnitine	400.342	8.657	0.560217	0.635219	0.456088	0.457867	0.51248	0.664207	0.434996	0.598598	0.57032
Cholic acid	407.28	1.865	96.2312	98.0925	78.6245	72.7126	101.642	100.547	24.157	48.7435	34.056
ancistrocladine	408.222	5.104	0.0118977	0.0123677	0.0141163	0.0106982	0.00830748	0.0103018	0.0133601	0.00782858	0.00991992
Irbesartan	429.24	6.006	0.000303072	0.000325909	0.00058768	0.000555426	0.000306099	0.000822244	0.000555966	0.000402714	0.000305757
(2'R,5'R,9S)-4-hydroxy-5',6a,8a,9-tetramethylicosahydrospiro[naphtho[2',1':4,5]indeno[2,1-b]furan-10,2'-pyran]-2(11aH)-one	431.309	11.057	4.1956e-07	0.00135993	0.00164869	0.000327921	0.000498319	0.000423431	0.000283203	0.000413335	4.1956e-07
3,5,6,7,8,3',4'-Heptamethoxyflavone	433.144	2.279	0.00784516	0.0102879	0.00743798	0.00844436	0.0115276	0.00541269	0.00499064	0.00812332	0.00731646
1-Oleoyl-sn-glycerol 3-phosphate	435.252	8.91333	0.998604	1.47572	1.62313	1.60179	1.755	1.7902	0.024522	2.26767	2.19435
Valsartan	436.233	6.923	0.00113722	0.00113278	0.00148262	0.000788423	0.000973217	0.000666329	0.00158046	0.00168874	0.00104211
Gomisin H	441.19	9.602	0.0178662	0.0153276	0.0149873	0.0139139	0.0119088	0.00596496	0.0113229	0.00871898	0.00640823
Cholesteryl sulfate	465.304	0.81	306.116	304.355	296.014	303.98	388.313	677.875	697.198	1047.72	1112.65
(E,6S)-7-hydroxy-2-methyl-6-[(10S,13S,14S,17S)-4,4,10,13,14-pentamethyl-3-oxo-1,2,5,6,7,11,12,15,16,17-decahydrocyclopenta[a]phenanthren-17-yl]hept-2-enoic acid	471.344	9.013	0.000157635	3.85165e-05	4.1956e-07	1.569e-06	1.6153e-06	9.84723e-05	0.00103232	4.1956e-07	4.1956e-07
Saikogenin D	473.361	9.282	0.000529203	4.1956e-07	4.1956e-07	4.1956e-07	0.000518511	0.000143605	0.00440335	4.1956e-07	0.000237912
Glyceryl trioctanoate	488.394	12.331	0.00777197	0.0154412	0.018773	0.00598181	0.00725672	0.00782855	0.193765	0.00752323	0.00576596
(9Z)-Hexadecenoic acid	507.441	0.865	0.202447	0.202447	0.202447	6.66465	0.202447	0.202447	0.202447	0.202447	0.202447
Taurocholate	514.284	3.305	0.202447	0.202447	0.202447	0.202447	0.202447	0.202447	0.202447	0.202447	66.6703
20(S),24(R)-Ocotillol	515.367	10.157	0.000144499	4.1956e-07	4.1956e-07	5.4915e-06	4.1956e-07	4.1956e-07	4.1956e-07	0.000206225	4.1956e-07
1-Stearoyl-sn-glycerol 3-phosphocholine	524.37	1.03833	382.036	393.325	293.675	269.549	222.695	272.212	312.853	166.361	364.013
(S,S)-asperphenamate	529.205	8.553	3.56555e-05	0.000450347	6.86124e-05	0.000415001	0.00114202	0.000144426	5.48135e-05	0.000392978	9.49837e-05
Biliverdin	583.254	2.69333	0.141756	0.141756	0.141756	0.141756	0.141756	4.04103	0.141756	0.141756	0.141756
Bilirubin	585.273	0.923333	3.82826	95.1765	25.5738	70.915	91.8151	112.06	0.141756	0.141756	0.141756
Glutathione (oxidized)	613.162	0.802	0.00675766	0.00767565	0.00815394	0.00671532	0.012202	0.0116485	0.00642624	0.010182	0.0102736
(1S,2R,4aS,6aR,6bR,10S,12aR,14bS)-1,2,6b,9,9,12a-hexamethyl-10-[(2R,3R,4S,5S,6R)-3,4,5-trihydroxy-6-methyloxan-2-yl]oxy-2,3,4,5,6,6a,7,8,8a,10,11,12,13,14b-tetradecahydro-1H-picene-4a,6a-dicarboxylic acid	633.406	5.235	0.00951815	0.00910767	0.00900414	0.00555426	0.00808941	0.00775223	0.00768825	0.00835344	0.00846712
Sphingomyelin (d18:1/18:0)	731.605	1.06333	32.9698	35.9423	23.9406	24.0524	18.2853	56.9576	38.5772	31.9357	30.089
PC(16:0/16:0)	734.569	1.055	129.771	131.527	104.504	127.002	112.284	268.684	149.37	175.229	141.031
Prosapogenin A	745.415	4.447	0.00398216	0.00518294	0.00376672	0.00408881	0.00516007	0.00314701	0.00652542	0.00478566	0.00527567
D-Proline	116.07	6.96	2.41949	0.141756	0.141756	0.141756	0.141756	0.141756	0.141756	0.141756	0.141756
L-Leucine	132.102	5.74	0.141756	3.01714	0.141756	0.141756	2.7931	0.141756	0.141756	0.141756	0.141756
alpha-Tocopherol	431.384	0.818333	10.1428	12.218	15.5283	18.0836	16.3303	41.3841	14.932	11.9866	15.2149
3-Methyl-2-oxopentanoate	132.102	5.74	228.655	221.583	234.66	209.698	249.969	196.902	250.985	202.765	194.944
L-Isoleucine	132.102	5.74	38.2014	38.796	35.3138	32.2608	38.2151	27.5676	29.4832	43.1186	33.3559
4-Hydroxycinnamic acid	163.04	1.71667	0.202447	0.202447	16.2491	18.3234	0.202447	10.8926	9.60378	45.9734	6.34431
Alpha-D-Glucosese	179.056	7.15833	1113.62	1657.98	1331.35	1355.71	1446.38	1083.28	2022.54	1054.62	1226.87
L-Gulonate	255.072	6.99667	20.3308	33.1088	22.2554	28.6648	22.9176	32.5915	7.18612	22.7563	25.4932
alpha-Linolenic acid	277.218	0.866667	273.152	324.003	296.742	315.901	236.798	331.706	400.688	382.715	367.161
9(10)-EpOME	295.228	0.903333	60.9555	68.3155	73.8052	68.2257	57.6494	76.0795	363.39	110.023	112.205
Chenodeoxycholate	357.279	6.932	59.4209	61.9966	46.6267	41.2778	43.4324	0.202447	0.202447	0.202447	0.202447
Taurochenodeoxycholate	498.289	2.06667	125.59	0.202447	126.701	164.145	80.9699	0.202447	32.6835	0.202447	0.202447
Citrate	215.016	0.781	130.073	96.1664	106.093	109.276	133.604	210.431	90.2718	121.439	131.113
(-)-Riboflavin	377.147	3.511	0.0101252	0.0107372	0.0105086	0.0089229	0.00967402	0.0103757	0.0102906	0.00749845	0.00886876
2-Piperidone	100.074	1.364	0.00366314	0.00882818	0.00803362	0.00801838	0.0116261	0.00829793	0.0184069	0.00798082	0.0100004
3-Formylindole	146.059	2.253	0.0457883	0.0490404	0.039824	0.0398816	0.0492052	0.032678	0.0342454	0.00325358	0.00940972
4-aminovaleric acid betaine	160.132	0.772	0.0871496	0.0943743	0.0798131	0.0705164	0.0924289	0.0570762	0.0674977	0.0589326	0.063867
4-Hydroxybenzoylcholine	224.127	8.527	0.116331	0.0783001	0.12459	0.0954509	0.093243	0.100973	0.165352	0.117402	0.108155
5'-S-Methylthioadenosine	298.096	2.622	0.00680646	0.0078949	0.005664	0.0060532	0.00497269	0.01219	0.00800017	0.00562206	0.00787641
Adenosine	268.103	0.931	0.0243058	0.0128309	0.018413	0.0116836	0.0124006	0.0066477	0.0207835	0.00855966	0.00104844
Arginine	175.118	0.584	0.1191	0.0980887	0.110635	0.0752602	0.0723984	0.0879489	0.0871431	0.103212	0.0961108
Atenolol acid	268.155	3.123	0.0018494	0.00208384	0.00212997	0.00136895	0.0014885	0.00196698	0.00321442	0.00175778	0.00164457
beta-Guanidinopropionic acid	132.076	0.6	0.300719	0.368259	0.391303	0.251783	0.263213	0.247614	0.266212	0.278913	0.29345
Biotion	245.095	3.422	0.00276424	0.00368277	0.00330135	0.00331059	0.00381937	0.00228374	0.003619	0.00326597	0.00151341
Butyryl carnitine	232.153	1.844	0.156362	0.211705	0.145373	0.086783	0.0940216	0.156463	0.128672	0.127944	0.204653
Chenodeoxycholic acid	357.279	6.932	0.0100877	0.011233	0.0127659	0.00990353	0.0121438	0.00489653	0.00602296	0.00283936	0.00433397
Choline	104.107	0.58	0.128969	0.130465	0.123717	0.0950124	0.0814045	0.0748808	0.0996145	0.105145	0.0838371
Clopidogrel carboxylic acid	308.051	4.237	0.000327468	0.000549107	0.000195893	2.43195e-05	0.000349712	0.000356141	0.000259712	0.000111521	9.22699e-05
Pantothenic acid	241.217	10.161	0.074262	0.0670938	0.0744435	0.0690517	0.0758043	0.069171	0.0556579	0.00968195	0.0746002
D-Alloisoleucine	132.1	0.333	0.0154332	0.0177206	0.0236196	0.0171586	0.019814	0.0180262	0.0243372	0.0168025	0.0182721
Erythromycin	734.471	5.372	0.0294055	0.0106128	0.0110317	0.00452186	0.0113588	0.00377887	0.0131474	0.00312081	0.00504499
Indole-3-carbinol	130.064	5.799	0.019755	0.0207752	0.0170666	0.0199726	0.0174533	0.0153124	0.0242928	0.0186213	0.0174119
Isoleucine	132.1	0.63	0.0158142	0.0117722	0.0123224	0.00971917	0.00967967	0.00863192	0.0180624	0.0126204	0.0109629
lenticin	247.144	2.827	0.000723432	0.000695272	0.000631433	0.000633876	0.000644504	0.000432457	0.000338017	0.000784186	0.00022977
Leupeptin	427.3	9.651	0.0149125	0.0103116	0.00703725	0.00748962	0.00228807	0.00137697	0.00220037	0.000529281	0.00191053
LPC 16:0	496.339	8.377	33.7277	36.78	33.5386	28.8707	28.5281	32.2585	24.1832	34.4919	30.2353
LPC 18:1	522.353	8.611	16.449	17.6147	13.0594	13.1401	14.2222	16.1168	11.8772	13.865	15.6827
LPC 18:2	520.339	7.932	21.2374	23.2473	20.4551	17.2361	20.1332	21.3885	19.1571	24.0304	17.7453
LPC 18:3	518.323	7.679	1.41437	1.30841	0.974412	1.07293	1.14886	1.12994	0.927856	1.36402	1.05822
LPE 18:1	480.306	8.333	0.186991	0.165484	0.168318	0.162566	0.134838	0.186378	0.12521	0.190635	0.195783
LPE 18:2	478.292	7.852	0.432079	0.470579	0.373644	0.36278	0.455772	0.587209	0.364169	0.590937	0.467018
Lysine	147.112	0.522	0.027953	0.0286039	0.0227087	0.0189096	0.0212105	0.0218879	0.00816722	0.0243036	0.0114107
Methionine	150.058	0.608	0.0250499	0.0228245	0.0276747	0.0193466	0.016581	0.0131887	0.0156388	0.0217846	0.0176887
Nicotinamide	123.055	0.808	0.0164625	0.0229035	0.0254482	0.0154295	0.0292191	0.0350364	0.0375877	0.0255923	0.0341878
O-Acetyl-L-carnitine	204.122	0.78	0.620278	0.767141	0.559961	0.487062	0.571374	0.554766	0.336429	0.587618	0.644827
Phthalic anhydride	149.023	5.236	0.297496	0.0873554	0.19045	0.192621	0.120577	0.159045	0.880965	0.0444915	0.215809
Phytosphingosine	318.3	7.473	0.0167018	0.0244925	0.0182867	0.0133271	0.0147654	0.0189009	0.0350728	0.0176902	0.0108761
Serotonin	177.102	1.124	0.0888996	0.091212	0.0790902	0.0877785	0.0932495	0.0642318	0.0582812	0.0822537	0.0225138
sn-Glycero-3-phosphocholine	258.111	0.641	0.0713965	0.108425	0.0956	0.0739454	0.0948373	0.0750277	0.897317	0.114582	0.0879531
Valine	118.085	0.602	0.230056	0.234717	0.247353	0.178111	0.150967	0.164173	0.182186	0.212057	0.185865
Warfarin	309.112	6.933	8.16324e-05	0.000226161	0.000694079	0.000101985	0.000295599	8.69839e-05	0.000229695	3.18631e-05	0.000155592

## Sheet: fecal identification C18&Hilic
name	mz	RT (min)	Ctr1	Ctr2	Ctr3	Ctr4	Ctr5	Abx1	Abx2	Abx3	Abx4	name	mz	rt
Creatinine	112.051	1.13167	0.255718	0.255718	148.976	268.309	303.185	168.147	216.467	250.478	146.567	Histamine	112.087	3.95333
D-Proline;L-Proline	114.056	3.00333	22.7571	47.039	43.3818	21.2601	57.7316	19.7261	55.758	0.255718	39.0717	Creatinine	114.066	1.12667
Succinate	117.019	5.64833	129.449	138.128	440.818	658.515	1101.95	607.424	517.138	300.771	465.904	D-Proline;L-Proline	116.07	2.99667
2-Hydroxy-3-methylbutyric acid	117.055	1.21667	1.96202	0.255718	80.3687	128.707	201.829	119.061	262.276	123.831	245.626	5-Aminopentanoic acid	118.086	6.44167
Nicotinate	122.025	1.94167	43.4198	58.9583	102.922	55.103	139.684	80.5544	94.5727	47.4218	152.757	Taurine	126.021	3.47833
Taurine	124.007	3.80333	0.255718	1009.15	0.255718	0.255718	2722.54	0.255718	966.642	1919.51	1704.92	L-Norleucine	132.101	2.08333
N-(Carboxymethyl)-D-alanine	128.035	3.83	0.255718	0.255718	16.2631	33.5201	44.2288	23.5296	43.1438	41.0396	82.5513	Hypoxanthine	137.045	1.03
L-Pyroglutamic acid	128.035	3.33833	4.90888	21.7259	153.121	233.961	282.977	159.869	237.799	198.33	323.704	1-Methylnicotinamide	137.071	2.45
L-Isoleucine;L-Leucine;L-Norleucine	130.087	2.06167	162.293	216.966	573.199	264.326	692.784	481.222	524.892	120.87	355.884	N-Acetylcadaverine	145.133	3.115
Glutaric acid;Ethylmalonic acid	131.035	7.03667	0.255718	0.255718	17.8165	13.552	20.5379	4.18921	0.255718	7.23157	0.255718	Acetylcholine	146.116	5.73
Adenine	134.047	0.915	157.584	222.546	49.9736	299.384	375.562	303.292	16.8883	82.9486	5.27551	L-Lysine	147.113	9.02333
L-Threonate	135.03	3.15667	0.255718	0.255718	29.0797	271.629	358.94	255.735	7.37095	125.099	15.0992	L-Glutamate	148.06	7.515
Hypoxanthine	135.033	0.998333	72.3275	126.803	357.515	163.226	436.106	312.273	49.6257	42.876	109.059	2-Hydroxyadenine	152.056	1.38
4-Hydroxybenzoate;Salicylic acid	137.028	1.12667	16.0749	62.0672	37.1237	126.763	57.8295	96.0467	21.8088	23.4872	55.046	N-Methylnicotinate	155.081	2.76667
Urocanic acid	137.036	2.88667	18.137	47.0586	89.3501	56.8669	103.938	66.5944	27.681	16.2425	56.7365	L-Carnitine	162.112	5.275
L-Lysine	145.098	9.03667	65.093	71.2643	196.078	63.6418	261.295	110.363	190.51	154.559	234.252	L-Phenylalanine	166.087	1.9
L-Glutamate	146.046	7.515	298.606	411.001	918.906	419.077	1133.81	700.277	827.678	791.503	735.398	N-Formimino-L-glutamate	175.071	7.64833
Acetylpyruvate	146.046	3.25167	133.612	268.98	164.223	360.375	362.543	143.619	61.2284	22.9608	39.7343	L-Arginine	175.119	8.7
(S)-2-Hydroxyglutarate	147.03	7.6	101.512	121.908	747.472	496.383	1053.69	536.635	239.684	614.682	594.806	L-Citrulline	176.103	6.68333
L-Methionine	148.044	2.51167	20.6344	32.8678	126.12	10.9532	122.318	66.2621	66.1315	10.8387	57.4867	L-Tyrosine;DL-O-tyrosine	182.081	3.10167
(S)-Lactate;(R)-Lactate	149.046	2.865	0.255718	0.255718	0.255718	0.255718	0.255718	4.28374	755.18	760.573	1354.12	N6-Acetyl-L-lysine;N-alpha-Acetyl-L-lysine	189.119	6.71
Orotate	155.01	1.47333	0.255718	0.255718	21.6473	54.0683	103.593	29.0112	24.9842	15.6294	9.11204	N6,N6,N6-Trimethyl-L-lysine	189.16	8.44167
Allantoin	157.037	1.28167	8.03602	7.88647	183.713	2277.62	1282.21	1185.93	97.6524	1214.37	11.726	Phenylacetylglycine	194.082	1.245
Isovalerylglycine	158.082	1.38833	0.255718	0.255718	396.014	1173.22	1193.92	938.85	96.1356	527.763	5.88678	D-Lysopine	201.123	5.62167
D-Alanyl-D-alanine (D-Ala-D-Ala)	159.075	6.51667	15.6225	25.7517	32.369	41.3049	25.7332	11.7442	135.895	0.255718	202.591	NG,NG-dimethyl-L-arginine(ADMA)	203.15	7.54833
4-Hydroxycinnamic acid;trans-2-Hydroxycinnamic acid	163.041	0.89	12.4496	22.3981	29.594	31.4806	15.9878	19.5718	13.6251	0.255718	7.66479	Pantothenate	220.118	2.28833
L-Phenylalanine	164.072	1.905	150.664	197.687	399.881	173.366	510.308	380.127	469.591	118.549	328.445	N-Acetyl-D-glucosamine;N-Acetylmannosamine	222.097	1.80333
3-(3-Hydroxyphenyl)propanoic acid;3-(2-Hydroxyphenyl)propanoate;Atrolactic acid;4-Methoxyphenylacetic acid	165.055	0.96	293.762	699.06	893.757	1508.92	1763.21	1491.4	251.626	0.255718	388.343	Deoxycytidine	228.098	1.35167
Uric acid	167.021	2.9	191.395	167.414	260.633	531.059	727.158	407.464	27.982	71.7375	0.255718	L-leucyl-L-proline	229.155	2.30667
Hexanoylglycine	172.098	1.12	0.255718	0.255718	762.081	7513.3	7130.28	4114.34	89.4481	1360.47	8.63904	5'-Deoxyadenosine;Deoxyadenosine	252.109	0.886667
cis-Aconitate	173.009	6.57667	0.255718	0.255718	58.0032	1252.49	1203.99	749.969	187.988	1345.64	195.055	Deoxyinosine	253.094	1.095
Shikimate	173.046	1.17167	2.3952	0.255718	9.23987	8.16041	104.373	49.21	2.0631	30.218	29.9499	N2-Succinyl-L-arginine	257.121	7.49333
Suberic acid	173.082	2.58667	96.5545	93.6362	113.27	124.661	279.745	91.4854	48.0783	68.6408	73.9029	Glycerophosphocholine	258.11	6.57167
L-Arginine	173.105	8.69	0.255718	16.2207	240.361	33.3459	208.145	91.5118	616.522	311.979	520.123	Thiamine	265.112	2.45833
N-Acetyl-L-aspartic acid	174.041	7.43	623.525	795.799	635.284	930.039	905.621	586.384	1209.27	969.465	1281.19	Deoxyguanosine	268.104	1.485
L-Citrulline	174.089	6.68667	66.1192	132.997	155.436	119.593	308.417	152.737	114.721	65.2162	113.966	Adenosine	268.106	0.975
Allantoate/Allantoic acid	175.051	6.36167	0.255718	0.255718	465.591	121.892	1222.39	596.932	42.8747	9.52707	27.912	Guanosine	284.099	1.815
2-Dehydro-3-deoxy-D-gluconate;2-Dehydro-3-deoxy-D-galactonate	177.041	3.00333	3.62619	2.04236	167.362	39.7885	258.343	227.543	719.558	741.948	1004.61	Riboflavin	377.145	0.991667
Hippuric acid	178.048	1.36667	6.12949	11.4075	312.951	3243.86	2360.12	1597.41	71.7791	149.533	0.255718	3alpha,12alpha-Dihydroxy-5beta-chol-6-enoate	391.284	1.56
D-Mannose;D-Allose;Alpha-D-Glucose;L-Sorbose	179.056	2.53667	308.28	891.08	638.976	603.53	872.904	740.578	506.904	675.142	609.999	Cholic acid	426.321	1.57667
L-Tyrosine	180.067	3.085	143.744	206.494	544.013	234.935	756.978	470.678	482.728	166.024	374.245	Taurodeoxycholic acid;Taurochenodeoxycholate	500.301	0.85
4-Pyridoxic acid	182.046	0.801667	288.448	316.965	435.676	365.186	941.21	337.932	182.527	292.927	241.808	Taurocholate	533.325	0.976667
2-Hydroxyethanesulfonate	185.014	2.66833	0.255718	0.255718	11.7934	41.5563	53.6802	29.9249	19.8566	19.0827	4.49685	Biliverdin	583.255	0.918333
Azelaic acid	187.098	2.10333	182.74	144.909	191.145	186.58	348.109	188.314	111.613	66.7777	102.527			0
N-alpha-Acetyl-L-lysine	187.109	6.70667	10.4914	12.6517	37.2837	33.3709	71.1329	31.9657	9.28011	23.877	13.8592			0
5-Hydroxyindoleacetate	190.05	2.08667	0.255718	0.255718	7.62693	88.6292	121.152	0.255718	0.255718	7.11246	0.255718			0
Isocitrate	191.02	8.16	12.4611	2.28908	13.2563	41.9249	51.1137	35.2094	0.255718	0.255718	0.255718			0
Phenylacetylglycine	192.067	1.305	30.6643	19.8365	655.623	4165.67	6964.74	2708.61	127.187	3467.75	49.9822			0
D-Glucuronate;D-galacturonic acid	193.036	6.67167	0.255718	0.255718	0.255718	0.255718	0.255718	0.255718	303.198	221.236	183.28			0
L-Gulonate;L-Galactonate	195.049	5.29667	24.8088	38.8666	2940.06	4366.27	5835.56	4499.65	0.255718	0.255718	0.255718			0
Sebacic acid	201.114	1.245	176.322	199.872	561.61	1581.36	1327.72	1182.03	8.99704	230.425	6.9867			0
Indolelactic acid	204.069	1.33	0.255718	0.255718	0.255718	0.255718	0.255718	0.255718	266.91	166.149	364.28			0
Indoxyl sulfate	212.004	0.82	0.255718	0.255718	0.255718	0.255718	0.255718	0.255718	0.255718	7.98928	0.255718			0
sn-Glycerol 3-phosphoethanolamine	214.05	6.97667	4.30919	7.98694	15.4829	0.255718	94.5268	46.0123	2.45872	4.5188	2.53355			0
5-Sulfosalicylate	216.983	2.81667	0.255718	0.255718	19.6492	46.0428	38.2901	40.71	79.3579	87.4329	85.6974			0
5-L-Glutamyl-L-alanine	217.083	8.66	18.3809	27.3411	111.852	39.6652	109.456	92.0618	38.7827	40.5824	76.5603			0
Pantothenate	218.104	2.28667	198.577	324.164	760.606	544.601	1411.43	425.48	164.054	195.376	399.67			0
L-Carnosine	225.1	8	0.255718	0.255718	0.255718	0.255718	0.255718	0.255718	0.255718	0.255718	0.255718			0
2-Dehydro-3-deoxy-L-galactonate	237.065	5.08	44.8545	49.5979	13.8328	0.255718	35.0656	5.28404	41.4055	33.4203	71.4619			0
L-Anserine	239.116	7.84	0.255718	0.255718	0.255718	0.255718	0.255718	0.255718	0.255718	0.255718	0.255718			0
Uridine	243.059	0.991667	36.6418	65.4071	330.764	131.216	364.592	354.457	30.0137	126.066	97.1512			0
Pseudouridine	243.062	1.41833	40.7067	45.7197	662.307	1111.83	1254	0.255718	41.091	313.359	4.27207			0
Deoxyinosine	251.079	1.095	245.669	521.919	462.431	106.5	883.11	386.573	28.2111	23.2476	95.0382			0
Palmitic acid	255.233	0.571667	391.595	457.164	1080.77	661.723	1157.7	1169.94	649.846	899.061	816.999			0
Thiamine	263.098	2.47	86.0217	72.0687	32.8951	77.961	88.703	21.2478	91.1254	81.8449	110.187			0
Deoxyguanosine	266.091	1.43667	158.935	593.253	444.66	78.1703	771.088	208.79	4.27848	0.255718	72.1204			0
Inosine	267.079	1.37833	40.8021	89.8639	434.15	19.693	6.81664	56.339	38.5443	63.3743	84.7932			0
Estrone;4,4'-Dihydroxy-2,2',3,3',5,5'-hexamethylbiphenyl	269.151	7.24833	0.255718	0.255718	0.255718	0.255718	0.255718	0.255718	0.255718	0.255718	0.255718			0
D-gamma-Glutamyl-L-lysine	274.141	8.505	0.255718	0.255718	0.255718	0.255718	0.255718	3.75619	178.451	172.096	297.814			0
gamma-L-Glutamyl-L-glutamic acid	275.089	9.14333	0.255718	0.255718	36.9552	5.29851	74.0288	52.8311	27.8413	13.4857	23.1008			0
Linoleic acid	279.233	0.571667	2736.53	3577.09	2276.25	2290.09	2236.28	3352.61	3249.75	3810.57	2930.19			0
Oleic acid;trans-Vaccenic acid	281.249	0.566667	1076.47	1366.42	1854.1	904.365	1756	1580.85	1188.14	1295.47	1293.97			0
Guanosine	282.085	1.815	15.7058	38.1675	351.155	48.9522	97.1216	103.606	5.66533	18.9618	20.3296			0
Stearic acid	283.265	0.946667	0.255718	0.255718	8.86707	22.1133	14.6536	31.7417	0.255718	0.255718	0.255718			0
cis-8,11,14-Eicosatrienoic acid	305.248	0.565	239.938	288.662	459.914	200.062	610.893	276.482	121.701	107.595	161.248			0
cis-11.14-Eicosadienoic acid	307.264	0.563333	0.255718	49.3324	177.08	28.7686	124.651	48.2125	0.255718	0.255718	17.3197			0
N-Acetylneuraminic acid	308.094	2.34	15.7167	39.8684	29.9914	0.255718	55.7906	15.9192	27.1061	0.255718	0.255718			0
Riboflavin	375.132	0.998333	15.718	14.6068	114.986	45.0101	61.9781	0.255718	0.255718	19.4061	41.0859			0
Lithocholic acid	375.287	0.585	317.183	226.365	381.991	151.629	535.48	0.255718	0.255718	0.255718	67.8419			0
Chenodeoxycholate;Deoxycholic acid	391.285	0.765	4719.34	4529.06	7823.56	6802.93	13036.6	6297.71	434.749	171.349	460.802			0
Mannobiose;Epimelibiose;Isomaltose;alpha,alpha-Trehalose;Sucrose;beta-1,2-Mannobiose	401.132	2.895	0.255718	5.86988	0.255718	0.255718	12.0649	29.687	222.052	423.599	226.344			0
Cholic acid	407.276	0.896667	0.255718	0.255718	0.255718	0.255718	0.255718	0.255718	0.255718	0.255718	9.17213			0
Glycodeoxycholic acid;Glycochenodeoxycholate	448.306	1.065	0.255718	0.255718	42.0681	18.564	101.416	57.6054	0.255718	0.255718	0.255718			0
Taurochenodeoxycholate;Taurodeoxycholic acid	498.29	0.853333	267.623	518.687	523.648	528.821	1386.2	264.205	3024.32	1543.08	1380.76			0
Taurocholate	514.285	0.99	1105.4	2966.66	2876.79	4128.91	9473.68	2111.52	64452.8	61471.7	35984.6			0
Cyclic adenosine diphosphate-ribose (cADPR)	540.054	7.53167	0.255718	0.255718	12.2551	22.0545	27.0872	0.255718	0.255718	0.255718	0.255718			0
Biliverdin	581.243	0.865	11.301	18.6799	10.1877	22.8245	0.255718	0.255718	0.255718	0.255718	7.903			0
Histamine	112.087	3.95333	0.0756263	0.0756263	0.0756263	0.0756263	0.0756263	4.03631	2.98865	9.01046	7.88578			0
5-Aminopentanoic acid	118.086	6.44167	0.0756263	9.51364	2.93363	4.01218	6.66861	6.61498	46.6003	35.2786	55.8266			0
L-Norleucine	132.101	2.08333	2.63539	2.62949	28.0355	7.34695	18.3306	21.7084	22.1917	0.0756263	0.0756263			0
1-Methylnicotinamide	137.071	2.45	0.0756263	0.0756263	32.8058	49.1696	46.6165	54.4882	11.7616	31.0119	8.24704			0
N-Acetylcadaverine	145.133	3.115	3.44458	4.28249	0.0756263	0.0756263	0.0756263	2.28095	34.3998	62.6377	47.5328			0
Acetylcholine	146.116	5.73	4.32934	10.1349	27.7541	20.6887	20.5418	25.7816	0.0756263	3.32524	0.0756263			0
2-Hydroxyadenine	152.056	1.38	21.8666	43.1986	23.9418	18.4281	27.4908	20.303	18.8418	18.6295	12.9048			0
N-Methylnicotinate	155.081	2.76667	6.34991	7.87219	2.5502	0.0756263	4.083	0.0756263	0.0756263	0.0756263	0.0756263			0
L-Carnitine	162.112	5.275	2.0521	3.59537	106.055	278.267	266.448	206.767	71.855	104.177	66.0818			0
N-Formimino-L-glutamate	175.071	7.64833	0.0756263	0.0756263	0.0756263	0.0756263	0.0756263	1.22755	9.58606	6.31979	11.7619			0
L-Tyrosine;DL-O-tyrosine	182.081	3.10167	0.0756263	0.0756263	11.1423	1.09649	8.96179	8.76987	7.96208	0.0756263	3.02334			0
N6-Acetyl-L-lysine;N-alpha-Acetyl-L-lysine	189.119	6.71	2.98439	3.82726	9.34858	10.2457	13.978	8.35144	5.57449	8.35917	5.66807			0
N6,N6,N6-Trimethyl-L-lysine	189.16	8.44167	0.0756263	0.0756263	51.2135	100.142	79.6532	82.1359	27.5745	55.125	25.9303			0
D-Lysopine	201.123	5.62167	3.7314	3.54747	0.0756263	0.0756263	1.67334	0.0756263	10.1525	9.93192	12.916			0
NG,NG-dimethyl-L-arginine(ADMA)	203.15	7.54833	12.4212	16.5351	106.774	193.958	156.727	145.218	53.5927	100.968	26.4288			0
N-Acetyl-D-glucosamine;N-Acetylmannosamine	222.097	1.80333	20.7647	55.0474	46.8384	14.1334	31.5649	28.6472	94.3789	5.30596	5.59794			0
Deoxycytidine	228.098	1.35167	3.13676	11.0946	0.0756263	3.62914	0.0756263	2.82664	0.0756263	0.0756263	0.0756263			0
L-leucyl-L-proline	229.155	2.30667	0.0756263	0.0756263	69.9156	110.626	94.1545	71.9162	2020.4	942.045	1164.31			0
5'-Deoxyadenosine;Deoxyadenosine	252.109	0.886667	45.9384	79.456	30.061	20.6841	38.3797	42.911	0.0756263	0.0756263	0.0756263			0
N2-Succinyl-L-arginine	257.121	7.49333	1.40235	1.75009	0.0756263	0.0756263	0.0756263	0.0756263	0.0756263	0.0756263	0.0756263			0
Glycerophosphocholine	258.11	6.57167	15.7763	18.8856	33.465	24.2607	60.0843	41.2432	35.7901	33.2505	17.847			0
Adenosine	268.106	0.975	3.83438	6.61664	20.0767	7.79953	9.62727	22.3705	2.26566	8.90468	1.7705			0
3alpha,12alpha-Dihydroxy-5beta-chol-6-enoate	391.284	1.56	7.77811	16.8728	0.0756263	6.28169	11.4258	2.07954	0.0756263	0.0756263	0.0756263			0
Taurodeoxycholic acid;Taurochenodeoxycholate	500.301	0.85	1.88642	8.54263	9.87049	6.00026	0.0756263	2.58475	121.764	5.35677	37.2982			0
Pyruvate	87.0033	17.8367	0.039954	0.039954	1.14677	1.53272	1.12099	2.04474	0.937401	0.039954	4.57249			0
Hydroxyisocaproic acid;2-Ethyl-2-Hydroxybutyric acid	131.071	3.88833	6.82143	0.039954	5.34464	10.0895	7.58118	9.6434	45.9939	0.039954	28.3991			0
L-Malic acid	133.014	0.61	23.0039	20.3741	19.6659	12.4764	19.0005	29.42	17.0773	9.49896	27.2346			0
Isobutyrylglycine	144.067	1.28	0.039954	0.039954	38.3445	203.958	104.587	140.612	2.0991	55.2873	0.039954			0
Adipic acid;3-Methylglutaric acid	145.051	1.92833	0.039954	0.039954	4.16887	8.20898	4.38345	5.7612	0.039954	4.10533	0.039954			0
Mevalonic acid	147.066	0.971667	0.039954	0.039954	5.75909	7.33881	5.16594	8.97729	1.64271	3.58604	4.00962			0
Xanthine	151.026	0.806667	48.6524	63.6359	210.64	24.9154	92.6706	93.36	0.039954	0.039954	4.70252			0
2-Hydroxyphenylacetic acid;3-Hydroxyphenylacetic acid;p-Hydroxyphenylacetic acid	151.04	4.09833	0.039954	3.3427	0.039954	5.29634	3.6331	4.91354	0.039954	0.039954	0.039954			0
2-Hydroxyphenylacetic acid;p-Hydroxyphenylacetic acid;3-Hydroxyphenylacetic acid	151.04	3.49667	19.7532	76.8241	7.6704	7.43706	9.73939	11.5426	13.8204	9.52575	2.69816			0
3,4-Dihydroxybenzoate (Protocatechuic acid);2,3-Dihydroxybenzoic acid	153.019	1.83333	0.039954	3.92507	2.11589	0.039954	2.85598	3.10914	0.039954	6.91057	2.73048			0
Pimelic acid	159.066	4.00333	3.22818	2.74502	9.72651	20.2639	13.6354	16.0428	0.039954	9.99489	0.039954			0
3-Methyladipic acid;Pimelic acid	159.066	3.79333	0.039954	0.039954	2.7421	8.15556	3.42123	6.95936	0.039954	3.8908	0.039954			0
Indole-3-carboxylic acid	160.041	6.01833	0.039954	0.039954	9.89776	16.0274	8.94199	14.2315	0.039954	0.039954	0.039954			0
Formylanthranilic acid	164.036	5.55	0.039954	0.039954	15.9122	15.0015	13.8643	18.4025	0.039954	5.11951	0.039954			0
Atrolactic acid;DL-3-Phenyllactic acid;Phenyllactic acid	165.056	4.95667	5.74102	5.86162	20.2184	36.1739	28.2282	32.8678	40.4803	29.2866	60.7308			0
3-(3-Hydroxyphenyl)propanoic acid;Atrolactic acid;3-(2-Hydroxyphenyl)propanoate;4-Methoxyphenylacetic acid	165.056	5.35833	60.3791	193.171	81.9947	66.9855	47.6796	97.7825	7.21397	2.89256	0.039954			0
Quinolinate	166.016	1.26	0.039954	8.19271	5.61134	3.35838	0.039954	0.039954	0.039954	8.36709	0.039954			0
(2S)-2-{[1-(R)-Carboxyethyl]amino}pentanoate	170.083	4.18167	0.039954	0.039954	0.039954	51.729	23.4429	24.9457	0.039954	8.5208	0.039954			0
Acetyl-DL-Leucine	172.098	4.48333	0.039954	0.039954	0.039954	5.16758	0.039954	3.00345	3.9124	0.039954	9.31695			0
Dopaquinone	176.035	1.24667	0.039954	0.039954	0.039954	0.039954	1.19465	0.039954	0.039954	0.039954	0.039954			0
4-Methoxycinnamic acid	177.056	8.02667	0.039954	14.2373	11.6021	0.039954	0.039954	32.8794	0.039954	0.039954	0.039954			0
3,4-Dihydroxyhydrocinnamic acid	181.05	3.705	0.039954	0.039954	0.039954	0.039954	0.039954	0.039954	3.08073	89.067	31.0462			0
Hydroxyphenyllactic acid	181.051	2.33167	0.039954	0.039954	10.0267	17.0724	14.9435	15.1532	48.0957	57.3045	161.878			0
Glycyl-L-leucine	187.108	1.36833	0.039954	0.039954	4.24708	0.039954	2.13513	4.16517	7.72091	3.75294	6.29909			0
Kynurenic acid	188.036	2.91333	33.2517	23.0793	18.1518	15.4081	21.1861	12.0651	0.039954	0.039954	0.039954			0
2-Formaminobenzoylacetate	188.036	3.78333	11.0901	8.55809	5.67496	6.34855	6.97767	3.78055	0.039954	0.039954	5.72238			0
N-Acetyl-L-glutamate	188.057	0.646667	7.4862	5.904	14.3418	13.9208	11.7802	12.0353	8.32648	0.039954	10.0101			0
Isocitrate;Citrate	191.021	0.605	6.57038	5.18238	36.7702	186.716	178.67	170.002	29.213	163.075	32.5278			0
Homoveratric acid	195.066	5.45667	0.039954	20.3426	0.039954	34.3462	5.66009	14.4777	63.2269	0.039954	133.913			0
L-Tryptophan	203.083	2.27	15.8493	16.1094	30.1037	29.907	26.4814	43.2828	39.2518	17.5997	35.7349			0
N-Malonylanthranilate;4-(2-Amino-3-hydroxyphenyl)-2,4-dioxobutanoate;7,8-Dihydro-7,8-dihydroxykynurenate	204.031	4.12833	9.91061	3.97984	0.039954	0.039954	0.039954	0.039954	0.039954	0.039954	0.039954			0
Xanthurenic acid	204.031	3.005	0.039954	0.039954	23.8596	57.2971	28.556	45.379	0.039954	15.7953	1.15691			0
4-(2-Aminophenyl)-2,4-dioxobutanoate	206.046	2.88167	0.695954	0.039954	0.039954	0.039954	0.039954	0.039954	0.039954	0.039954	0.039954			0
3-Indoleacetonitrile	215.086	3.57833	0.039954	0.039954	0.039954	3.58506	0.039954	0.039954	0.039954	0.039954	0.603758			0
4-Hydroxy-2-quinolone	220.062	5.63667	0.039954	4.21999	4.42918	0.039954	0.039954	3.38633	19.1201	0.039954	15.6643			0
Traumatic Acid	227.13	8.91333	3.2932	7.56627	2.01477	0.039954	0.039954	0.039954	0.039954	0.039954	0.039954			0
Myristic acid	227.203	15.98	5.65516	0.039954	18.2671	0.039954	0.039954	8.89989	0.039954	0.039954	0.039954			0
Suberylglycine	230.104	4.425	0.039954	0.039954	0.039954	33.2961	15.516	18.5891	7.38674	6.96732	11.9808			0
Pentadecanoic Acid	241.218	16.7717	2.28253	0.039954	21.4833	1.7314	8.14285	0.039954	0.039954	0.039954	0.039954			0
cis-9-Palmitoleic acid	253.218	16.5233	52.5173	51.8303	0.039954	23.6663	91.9478	64.2255	48.5534	39.1953	21.4944			0
16-Oxopalmitate	269.213	12.8667	0.039954	0.039954	0.039954	0.039954	4.26023	0.039954	2.17323	1.44861	2.4461			0
10,16-Dihydroxyhexadecanoic acid	269.213	12.6467	0.039954	0.039954	1.39387	0.039954	1.9013	4.5544	1.95614	0.039954	0.039954			0
16-Hydroxypalmitic acid	271.229	13.32	2.80185	0.039954	2.88001	0.562425	0.039954	0.039954	1.0353	1.27676	0.039954			0
2-Dehydro-3-deoxy-6-phospho-D-galactonate	274.034	3.79833	30.7559	30.532	33.0497	24.2987	28.6817	20.7404	11.362	11.2682	20.8768			0
gamma-Glutamyl-L-methionine	277.087	1.155	0.039954	0.039954	2.20128	0.616205	1.37844	1.89185	4.12379	4.14445	2.88686			0
alpha-Linolenic acid;all cis-(6,9,12)-Linolenic acid	277.218	16.0017	93.4374	115.152	50.3924	57.0191	21.2562	120.313	67.0493	104.013	46.1715			0
trans-Vaccenic acid;Oleic acid	281.25	17.8383	245.196	284.664	412.22	160.207	208.342	359.834	232.932	265.396	200.308			0
Xanthosine	283.07	1.08667	0.039954	0.039954	12.8233	4.58017	6.21144	1.76543	0.039954	0.039954	0.039954			0
Pentadecanal	285.245	15.76	22.2104	0.039954	99.3884	21.4533	60.3251	33.565	0.039954	0.039954	0.039954			0
9,10-Epoxy-18-hydroxystearate	295.228	14.3267	2.12661	0.039954	3.0256	0.039954	0.039954	2.42361	0.039954	0.039954	0.039954			0
5'-S-Methyl-5'-thioinosine	297.068	3.445	0.039954	0.039954	14.6724	1.79478	9.48051	15.5565	0.039954	0.039954	0.039954			0
cis-9,10-Epoxystearic acid	297.245	14.0067	709.693	900.748	1098.59	640.292	729.571	1149.71	328.385	426.416	561.379			0
(R)-10-Hydroxystearate	299.26	14.9017	435.129	501.575	1089.99	425.124	645.024	715.343	93.2748	186.285	134.969			0
Eicosapentaenoic acid	301.219	15.94	153.247	169.6	49.3256	81.7634	56.8305	135.39	84.3208	75.2958	59.0683			0
N-Acetylaspartylglutamate (NAAG)	303.08	0.8	0.039954	0.039954	6.8499	1.62977	0.039954	0.039954	13.4874	15.1832	19.7868			0
Arachidonic Acid (peroxide free)	303.232	16.5383	0.039954	0.039954	0.611313	0.113858	0.039954	0.039954	0.039954	0.039954	0.039954			0
Hexadecanedioate	307.192	12.505	222.616	186.488	408.938	101.154	194.513	0.039954	0.039954	0.039954	0.039954			0
trans-11-Eicosenoic acid	309.282	19.1117	0.039954	0.039954	9.51447	0.039954	0.039954	0.039954	0.039954	0.039954	0.039954			0
9,10,18-Trihydroxystearate;9,10-Epoxy-18-hydroxystearate	313.239	11.9333	0.039954	0.039954	112.559	46.6459	40.0385	0.039954	44.2144	0.039954	0.039954			0
9,10-Dihydroxystearate	315.253	11.535	7.0668	4.05015	40.4189	4.12856	6.8973	17.6313	6.36036	13.8395	10.3406			0
18-Hydroxyoleate	319.229	14.075	6.26525	10.6996	0.039954	0.039954	0.039954	7.07685	0.039954	0.039954	0.039954			0
11-Deoxycorticosterone;11beta-Hydroxyprogesterone	329.214	12.255	0.039954	0.039954	0.039954	0.039954	0.039954	0.039954	0.039954	0.039954	0.039954			0
9,10,18-Trihydroxystearate	331.248	9.40333	35.5187	37.2992	17.5117	17.9622	20.6245	19.6971	16.9537	16.188	23.5021			0
Tetrahydrocorticosterone	349.238	17.84	53.0082	56.7516	64.1899	36.7805	45.4886	67.1717	51.8143	58.5332	45.9773			0
3alpha,20alpha,21-Trihydroxy-5beta-pregnan-11-one	349.238	10.9283	0.039954	7.8124	5.32153	13.4454	22.1046	25.2157	0.039954	0.039954	0.039954			0
N-Acetyl-9-O-acetylneuraminate;N-Acetyl-4-O-acetylneuraminate;N-Acetyl-7-O-acetylneuraminate	350.11	4.99667	0.609021	4.05255	1.22741	9.01436	0.039954	0.039954	18.6527	34.777	25.0437			0
7-Oxodeoxycholate;3alpha,7alpha-Dihydroxy-12-oxo-5beta-cholanate	387.255	12.0017	115.179	35.8634	109.08	55.47	88.8934	61.2721	0.039954	0.039954	5.19182			0
Deoxycholic acid;Chenodeoxycholate	391.286	13.4	0.039954	0.039954	4.90443	2.64646	0.039954	0.039954	0.039954	0.039954	0.039954			0
3alpha,7alpha-Dihydroxy-12-oxo-5beta-cholanate;7-Oxodeoxycholate	405.266	9.09167	0.039954	0.039954	7.67904	3.81726	0.039954	2.99366	0.039954	0.039954	2.73048			0
Glycocholic acid	464.301	8.71	0.039954	0.039954	10.6047	0.039954	6.58929	8.49913	6.19002	5.82653	0.039954			0
Cholesteryl sulfate	465.298	11.3467	26.2061	48.9474	0.039954	35.1102	12.6331	122.171	17.1847	16.682	13.4938			0
3alpha,7alpha,12beta-Trihydroxy-5beta-cholanate	467.302	12.5067	0.039954	3.17011	0.039954	2.48278	0.039954	0.039954	0.039954	0.039954	0.039954			0
Taurolithocholic acid	482.288	7.34667	3.29726	5.66775	0.039954	0.039954	0.039954	3.93263	0.039954	0.039954	0.039954			0
Glycodeoxycholate;Glycochenodeoxycholate	486.266	7.67167	0.039954	0.039954	0.039954	0.039954	0.039954	0.039954	0.039954	0.039954	0.039954			0
Taurohyocholate	496.278	11.7617	23.6707	68.7462	0.039954	33.358	8.86859	14.3718	42.9434	50.9984	60.7236			0
Taurolithocholate sulfate	562.246	7.54333	0.039954	0.039954	0.039954	0.039954	0.039954	0.039954	0.039954	0.039954	0.039954			0
Bilirubin	583.259	19.19	8.04417	19.0086	10.434	21.0593	14.8697	16.701	14.2464	10.7951	11.3835			0
Rutin	609.152	6.29	0.039954	0.039954	0.039954	0.039954	0.039954	0.039954	4.93619	2.95377	5.8009			0
Reduced nicotinamide adenine dinucleotide (NADH)	664.12	3.78333	16.2934	15.2421	8.89545	9.50706	12.5018	6.1339	0.039954	0.039954	0.039954			0
5-Aminopentanoic acid;L-Valine	118.086	0.598333	32.7815	46.1547	47.345	34.3626	44.4416	53.0619	204.906	140.134	218.905			0
L-Norleucine;L-Isoleucine	132.102	0.856667	61.7403	49.5938	142.194	59.2751	94.167	140.302	91.0179	34.8789	77.4259			0
L-Histidine	156.08	0.631667	4.66547	3.30517	0.123111	6.34018	0.123111	0.123111	8.13747	0.123111	9.33181			0
N-Acetyl-L-citrulline	200.103	0.768333	4.54257	0.123111	0.123111	0.123111	0.123111	0.123111	0.123111	0.123111	0.123111			0
N-Acetyl-D-glucosamine	222.092	0.685	22.2603	21.4265	6.60049	13.6623	12.1326	14.3412	18.4785	5.35822	9.88324			0
Colneleate	277.216	14.3033	20.2088	20.103	14.0043	12.5423	0.123111	19.7517	17.1138	9.65571	14.5854			0
Crepenynate;(6Z,9Z,12Z)-Octadecatrienoic acid	279.23	17.535	0.123111	0.123111	9.34898	0.123111	0.123111	9.62545	7.51765	10.3313	0.123111			0
(6Z,9Z,12Z)-Octadecatrienoic acid;Crepenynate	279.232	13.6717	17.1732	21.6599	40.6672	43.6693	28.8234	16.124	53.7606	10.499	35.8821			0
12(13)-EpOME;9(10)-EpOME;18-Oxooleate	279.232	14.6533	178.918	166.003	74.3409	75.2334	31.6346	133.277	97.9257	177.859	43.083			0
Oleamide	282.279	17.0833	1010.27	808.439	17.4567	15.4098	1068.36	26.1944	26.2063	26.4599	804.685			0
Stearamide	284.289	18.2417	60.5984	38.7507	26.1408	23.7134	34.6054	33.1124	28.908	42.6093	30.9278			0
9(S)-HPODE;(7S,8S)-DiHODE;5S,8R-DiHODE;8(R)-HPODE	295.222	12.2867	6.37033	6.13357	5.73701	3.74744	0.123111	5.54735	3.97562	0.123111	0.123111			0
S-Methyl-5'-thioadenosine	298.097	2.9	0.123111	0.123111	0.123111	13.7086	6.76257	7.38251	0.123111	13.3807	0.123111			0
18-Hydroxyoleate;cis-9,10-Epoxystearic acid	299.258	15.3733	203.964	160.716	5.17051	178.43	286.533	318.221	45.2445	5.50427	38.0217			0
9-cis,11-trans-Octadecadienoate	303.229	16.855	31.4458	32.5177	26.8804	22.0645	18.2021	5.72637	28.7378	37.5866	28.5647			0
(8E,10S)-10-Hydroperoxyoctadeca-8-enoate;9,10-Epoxy-18-hydroxystearate;9,10,18-Trihydroxystearate;9,10-DHOME;12,13-DHOME	315.253	11.6117	38.1205	40.3235	32.9898	52.8245	51.2586	59.9945	51.6147	70.7463	41.7916			0
Erucamide	338.342	20.0033	1306.96	1309.43	1202.98	1099.02	1102.16	1376.99	1331.67	1629.07	1362.84			0
Lithocholic acid;Isolithocholate	359.296	14.7467	258.545	91.0094	4.13573	90.9311	223.429	191.388	0.123111	0.123111	0.123111			0
3-Oxo-5beta-cholanate	375.289	11.4717	0.123111	0.123111	319.261	0.123111	358.208	0.123111	8.8445	20.7775	25.0419			0
Chenodeoxycholate;Murideoxycholic acid;Hyodeoxycholate;Deoxycholic acid	410.326	12.5017	1551.3	1236.98	1543.6	1515.78	1882.51	1511.56	104.451	51.8613	158.174			0
Folinic acid	474.173	3.07167	0.123111	0.123111	0.123111	0.123111	0.123111	0.123111	32.0917	45.6556	47.9815			0
D-Urobilinogen	591.317	9.42333	141.888	166.501	78.02	51.0888	69.6011	24.5731	0.123111	38.628	11.7006			0
I-Urobilinogen	593.332	14.195	35.7178	63.3586	237.758	35.2264	106.699	52.1348	0.123111	0.123111	0.123111			0

## Sheet: Cor. coef Fig. 6a 
genus	altered fecal metabolites	cor	pvalue
Escherichia-Shigella	Hexadecanedioate	-0.777132	0.0137295
Clostridia_vadinBB60_group	Hexadecanedioate	0.752915	0.0191997
Bacteroides	Hexadecanedioate	0.872673	0.00213667
Rikenellaceae_RC9_gut_group	Hexadecanedioate	0.633262	0.0671259
Parabacteroides	Hexadecanedioate	0.763337	0.0166955
Alistipes	Hexadecanedioate	0.557024	0.119243
Lachnospiraceae_NK4A136_group	Hexadecanedioate	0.929418	0.000286938
[Eubacterium]_xylanophilum_group	Hexadecanedioate	0.862783	0.00274826
Clostridium_sensu_stricto_1	Hexadecanedioate	-0.710954	0.0317789
Candidatus_Saccharimonas	Hexadecanedioate	0.612469	0.0795415
Enterococcus	Hexadecanedioate	-0.696682	0.0370396
Clostridia_UCG-014	Hexadecanedioate	0.85775	0.00310152
Butyricimonas	Hexadecanedioate	0.426463	0.25235
Alloprevotella	Hexadecanedioate	0.482804	0.188025
NK4A214_group	Hexadecanedioate	0.774388	0.0142888
Enterorhabdus	Hexadecanedioate	0.435089	0.24183
Lachnoclostridium	Hexadecanedioate	0.695431	0.0375259
Bilophila	Hexadecanedioate	0.910057	0.000657393
Incertae_Sedis	Hexadecanedioate	0.595447	0.0906949
Parasutterella	Hexadecanedioate	0.319625	0.401781
Escherichia-Shigella	Pentadecanoic.Acid	-0.464766	0.207487
Clostridia_vadinBB60_group	Pentadecanoic.Acid	0.399156	0.287219
Bacteroides	Pentadecanoic.Acid	0.746146	0.0209526
Rikenellaceae_RC9_gut_group	Pentadecanoic.Acid	0.227225	0.556557
Parabacteroides	Pentadecanoic.Acid	0.628361	0.0699346
Alistipes	Pentadecanoic.Acid	0.285351	0.456701
Lachnospiraceae_NK4A136_group	Pentadecanoic.Acid	0.651828	0.057134
[Eubacterium]_xylanophilum_group	Pentadecanoic.Acid	0.588989	0.0951638
Clostridium_sensu_stricto_1	Pentadecanoic.Acid	-0.425237	0.253865
Candidatus_Saccharimonas	Pentadecanoic.Acid	0.120837	0.756809
Enterococcus	Pentadecanoic.Acid	-0.420855	0.259317
Clostridia_UCG-014	Pentadecanoic.Acid	0.499035	0.17143
Butyricimonas	Pentadecanoic.Acid	0.139415	0.720546
Alloprevotella	Pentadecanoic.Acid	0.216593	0.575648
NK4A214_group	Pentadecanoic.Acid	0.367426	0.330663
Enterorhabdus	Pentadecanoic.Acid	0.0804288	0.837032
Lachnoclostridium	Pentadecanoic.Acid	0.41747	0.263571
Bilophila	Pentadecanoic.Acid	0.685513	0.0415277
Incertae_Sedis	Pentadecanoic.Acid	0.162504	0.676149
Parasutterella	Pentadecanoic.Acid	0.111908	0.774388
Escherichia-Shigella	N-Methylnicotinate	-0.664472	0.0509025
Clostridia_vadinBB60_group	N-Methylnicotinate	0.643528	0.061476
Bacteroides	N-Methylnicotinate	0.490646	0.179899
Rikenellaceae_RC9_gut_group	N-Methylnicotinate	0.688443	0.040318
Parabacteroides	N-Methylnicotinate	0.438653	0.237555
Alistipes	N-Methylnicotinate	0.534911	0.137839
Lachnospiraceae_NK4A136_group	N-Methylnicotinate	0.635666	0.065775
[Eubacterium]_xylanophilum_group	N-Methylnicotinate	0.579584	0.101908
Clostridium_sensu_stricto_1	N-Methylnicotinate	-0.607842	0.082484
Candidatus_Saccharimonas	N-Methylnicotinate	0.831083	0.00550598
Enterococcus	N-Methylnicotinate	-0.587885	0.0959407
Clostridia_UCG-014	N-Methylnicotinate	0.842975	0.0043171
Butyricimonas	N-Methylnicotinate	0.450796	0.223296
Alloprevotella	N-Methylnicotinate	0.567888	0.110691
NK4A214_group	N-Methylnicotinate	0.781605	0.0128495
Enterorhabdus	N-Methylnicotinate	0.490795	0.179746
Lachnoclostridium	N-Methylnicotinate	0.54352	0.130409
Bilophila	N-Methylnicotinate	0.566531	0.111738
Incertae_Sedis	N-Methylnicotinate	0.712071	0.0313891
Parasutterella	N-Methylnicotinate	0.212824	0.582471
Escherichia-Shigella	Lithocholic.acid	-0.791444	0.0110487
Clostridia_vadinBB60_group	Lithocholic.acid	0.612634	0.0794377
Bacteroides	Lithocholic.acid	0.913401	0.000577683
Rikenellaceae_RC9_gut_group	Lithocholic.acid	0.721366	0.0282657
Parabacteroides	Lithocholic.acid	0.827849	0.00586412
Alistipes	Lithocholic.acid	0.78054	0.0130554
Lachnospiraceae_NK4A136_group	Lithocholic.acid	0.678715	0.0444229
[Eubacterium]_xylanophilum_group	Lithocholic.acid	0.585355	0.0977366
Clostridium_sensu_stricto_1	Lithocholic.acid	-0.767303	0.0158029
Candidatus_Saccharimonas	Lithocholic.acid	0.510242	0.16048
Enterococcus	Lithocholic.acid	-0.736902	0.0235132
Clostridia_UCG-014	Lithocholic.acid	0.661426	0.0523622
Butyricimonas	Lithocholic.acid	0.591858	0.0931622
Alloprevotella	Lithocholic.acid	0.811545	0.00791384
NK4A214_group	Lithocholic.acid	0.515593	0.155398
Enterorhabdus	Lithocholic.acid	0.347395	0.359658
Lachnoclostridium	Lithocholic.acid	0.419606	0.260882
Bilophila	Lithocholic.acid	0.551168	0.124012
Incertae_Sedis	Lithocholic.acid	0.336196	0.376381
Parasutterella	Lithocholic.acid	0.496608	0.173856
Escherichia-Shigella	L-Urobilinogen	-0.595258	0.0908236
Clostridia_vadinBB60_group	L-Urobilinogen	0.506894	0.163708
Bacteroides	L-Urobilinogen	0.781549	0.0128602
Rikenellaceae_RC9_gut_group	L-Urobilinogen	0.272836	0.477517
Parabacteroides	L-Urobilinogen	0.691689	0.0390047
Alistipes	L-Urobilinogen	0.365166	0.333874
Lachnospiraceae_NK4A136_group	L-Urobilinogen	0.702347	0.0348884
[Eubacterium]_xylanophilum_group	L-Urobilinogen	0.668997	0.0487826
Clostridium_sensu_stricto_1	L-Urobilinogen	-0.487522	0.183111
Candidatus_Saccharimonas	L-Urobilinogen	0.263791	0.492804
Enterococcus	L-Urobilinogen	-0.470139	0.201579
Clostridia_UCG-014	L-Urobilinogen	0.630424	0.0687433
Butyricimonas	L-Urobilinogen	0.241313	0.531637
Alloprevotella	L-Urobilinogen	0.294578	0.441609
NK4A214_group	L-Urobilinogen	0.488708	0.181888
Enterorhabdus	L-Urobilinogen	0.222152	0.565637
Lachnoclostridium	L-Urobilinogen	0.549741	0.125191
Bilophila	L-Urobilinogen	0.731459	0.0251129
Incertae_Sedis	L-Urobilinogen	0.305976	0.423276
Parasutterella	L-Urobilinogen	0.145863	0.708068
Escherichia-Shigella	Kynurenic.acid	-0.886311	0.00145729
Clostridia_vadinBB60_group	Kynurenic.acid	0.759787	0.0175225
Bacteroides	Kynurenic.acid	0.680777	0.0435314
Rikenellaceae_RC9_gut_group	Kynurenic.acid	0.90009	0.000940187
Parabacteroides	Kynurenic.acid	0.611716	0.0800157
Alistipes	Kynurenic.acid	0.702499	0.0348319
Lachnospiraceae_NK4A136_group	Kynurenic.acid	0.783087	0.0125664
[Eubacterium]_xylanophilum_group	Kynurenic.acid	0.699941	0.0357918
Clostridium_sensu_stricto_1	Kynurenic.acid	-0.726105	0.0267548
Candidatus_Saccharimonas	Kynurenic.acid	0.820805	0.00669862
Enterococcus	Kynurenic.acid	-0.693555	0.0382625
Clostridia_UCG-014	Kynurenic.acid	0.77368	0.0144355
Butyricimonas	Kynurenic.acid	0.599965	0.087646
Alloprevotella	Kynurenic.acid	0.688205	0.0404155
NK4A214_group	Kynurenic.acid	0.773873	0.0143954
Enterorhabdus	Kynurenic.acid	0.56308	0.114428
Lachnoclostridium	Kynurenic.acid	0.549286	0.125569
Bilophila	Kynurenic.acid	0.665056	0.0506256
Incertae_Sedis	Kynurenic.acid	0.673511	0.0467254
Parasutterella	Kynurenic.acid	0.511789	0.159001
Escherichia-Shigella	7-Oxodeoxycholate	-0.807423	0.00849989
Clostridia_vadinBB60_group	7-Oxodeoxycholate	0.586777	0.0967249
Bacteroides	7-Oxodeoxycholate	0.755545	0.0185457
Rikenellaceae_RC9_gut_group	7-Oxodeoxycholate	0.741344	0.0222584
Parabacteroides	7-Oxodeoxycholate	0.62649	0.0710256
Alistipes	7-Oxodeoxycholate	0.569574	0.109398
Lachnospiraceae_NK4A136_group	7-Oxodeoxycholate	0.761814	0.0170471
[Eubacterium]_xylanophilum_group	7-Oxodeoxycholate	0.63184	0.0679338
Clostridium_sensu_stricto_1	7-Oxodeoxycholate	-0.641004	0.0628362
Candidatus_Saccharimonas	7-Oxodeoxycholate	0.491615	0.178908
Enterococcus	7-Oxodeoxycholate	-0.606544	0.083321
Clostridia_UCG-014	7-Oxodeoxycholate	0.593479	0.0920426
Butyricimonas	7-Oxodeoxycholate	0.402531	0.28278
Alloprevotella	7-Oxodeoxycholate	0.54476	0.129359
NK4A214_group	7-Oxodeoxycholate	0.557005	0.119258
Enterorhabdus	7-Oxodeoxycholate	0.286965	0.454046
Lachnoclostridium	7-Oxodeoxycholate	0.38049	0.3124
Bilophila	7-Oxodeoxycholate	0.676697	0.0453068
Incertae_Sedis	7-Oxodeoxycholate	0.371278	0.325224
Parasutterella	7-Oxodeoxycholate	0.417692	0.263291
Escherichia-Shigella	Chenodeoxycholate	-0.760172	0.0174315
Clostridia_vadinBB60_group	Chenodeoxycholate	0.496679	0.173785
Bacteroides	Chenodeoxycholate	0.823484	0.00637233
Rikenellaceae_RC9_gut_group	Chenodeoxycholate	0.558273	0.118241
Parabacteroides	Chenodeoxycholate	0.813048	0.00770722
Alistipes	Chenodeoxycholate	0.776815	0.0137933
Lachnospiraceae_NK4A136_group	Chenodeoxycholate	0.452521	0.22131
[Eubacterium]_xylanophilum_group	Chenodeoxycholate	0.422987	0.256657
Clostridium_sensu_stricto_1	Chenodeoxycholate	-0.581408	0.100579
Candidatus_Saccharimonas	Chenodeoxycholate	0.320525	0.400382
Enterococcus	Chenodeoxycholate	-0.543523	0.130407
Clostridia_UCG-014	Chenodeoxycholate	0.408602	0.27489
Butyricimonas	Chenodeoxycholate	0.64606	0.0601297
Alloprevotella	Chenodeoxycholate	0.795701	0.0103254
NK4A214_group	Chenodeoxycholate	0.278932	0.467329
Enterorhabdus	Chenodeoxycholate	0.356487	0.346349
Lachnoclostridium	Chenodeoxycholate	0.325304	0.39299
Bilophila	Chenodeoxycholate	0.307712	0.420513
Incertae_Sedis	Chenodeoxycholate	0.16346	0.674327
Parasutterella	Chenodeoxycholate	0.60478	0.0844677
Escherichia-Shigella	5'-Deoxyadenosine	-0.722304	0.0279625
Clostridia_vadinBB60_group	5'-Deoxyadenosine	0.639501	0.0636551
Bacteroides	5'-Deoxyadenosine	0.440124	0.235803
Rikenellaceae_RC9_gut_group	5'-Deoxyadenosine	0.552784	0.122685
Parabacteroides	5'-Deoxyadenosine	0.451829	0.222105
Alistipes	5'-Deoxyadenosine	0.515184	0.155784
Lachnospiraceae_NK4A136_group	5'-Deoxyadenosine	0.550058	0.124929
[Eubacterium]_xylanophilum_group	5'-Deoxyadenosine	0.5646	0.113239
Clostridium_sensu_stricto_1	5'-Deoxyadenosine	-0.527417	0.144505
Candidatus_Saccharimonas	5'-Deoxyadenosine	0.771187	0.0149603
Enterococcus	5'-Deoxyadenosine	-0.486982	0.18367
Clostridia_UCG-014	5'-Deoxyadenosine	0.765009	0.0163152
Butyricimonas	5'-Deoxyadenosine	0.49791	0.172552
Alloprevotella	5'-Deoxyadenosine	0.512363	0.158455
NK4A214_group	5'-Deoxyadenosine	0.719696	0.0288111
Enterorhabdus	5'-Deoxyadenosine	0.585735	0.0974651
Lachnoclostridium	5'-Deoxyadenosine	0.606774	0.0831722
Bilophila	5'-Deoxyadenosine	0.494474	0.176006
Incertae_Sedis	5'-Deoxyadenosine	0.702842	0.0347046
Parasutterella	5'-Deoxyadenosine	0.261733	0.496309
Escherichia-Shigella	Xanthine	-0.57553	0.104903
Clostridia_vadinBB60_group	Xanthine	0.430534	0.247355
Bacteroides	Xanthine	0.67993	0.0438965
Rikenellaceae_RC9_gut_group	Xanthine	0.226315	0.558182
Parabacteroides	Xanthine	0.579419	0.102029
Alistipes	Xanthine	0.270679	0.481145
Lachnospiraceae_NK4A136_group	Xanthine	0.647373	0.0594397
[Eubacterium]_xylanophilum_group	Xanthine	0.600189	0.0874967
Clostridium_sensu_stricto_1	Xanthine	-0.420431	0.259848
Candidatus_Saccharimonas	Xanthine	0.227941	0.55528
Enterococcus	Xanthine	-0.392124	0.296578
Clostridia_UCG-014	Xanthine	0.588111	0.0957817
Butyricimonas	Xanthine	0.144799	0.710123
Alloprevotella	Xanthine	0.212748	0.58261
NK4A214_group	Xanthine	0.45347	0.220221
Enterorhabdus	Xanthine	0.151006	0.698158
Lachnoclostridium	Xanthine	0.477757	0.193362
Bilophila	Xanthine	0.689693	0.039809
Incertae_Sedis	Xanthine	0.269288	0.483489
Parasutterella	Xanthine	0.05027	0.897806
Escherichia-Shigella	cis-8,11,14-Eicosatrienoic.acid	-0.657643	0.0542113
Clostridia_vadinBB60_group	cis-8,11,14-Eicosatrienoic.acid	0.391056	0.298013
Bacteroides	cis-8,11,14-Eicosatrienoic.acid	0.813811	0.00760373
Rikenellaceae_RC9_gut_group	cis-8,11,14-Eicosatrienoic.acid	0.409896	0.273221
Parabacteroides	cis-8,11,14-Eicosatrienoic.acid	0.75425	0.0188659
Alistipes	cis-8,11,14-Eicosatrienoic.acid	0.630321	0.0688027
Lachnospiraceae_NK4A136_group	cis-8,11,14-Eicosatrienoic.acid	0.448551	0.225897
[Eubacterium]_xylanophilum_group	cis-8,11,14-Eicosatrienoic.acid	0.38724	0.30317
Clostridium_sensu_stricto_1	cis-8,11,14-Eicosatrienoic.acid	-0.55436	0.121399
Candidatus_Saccharimonas	cis-8,11,14-Eicosatrienoic.acid	0.23373	0.544996
Enterococcus	cis-8,11,14-Eicosatrienoic.acid	-0.512332	0.158484
Clostridia_UCG-014	cis-8,11,14-Eicosatrienoic.acid	0.479491	0.191519
Butyricimonas	cis-8,11,14-Eicosatrienoic.acid	0.447008	0.227693
Alloprevotella	cis-8,11,14-Eicosatrienoic.acid	0.682562	0.0427693
NK4A214_group	cis-8,11,14-Eicosatrienoic.acid	0.269924	0.482417
Enterorhabdus	cis-8,11,14-Eicosatrienoic.acid	0.172865	0.656494
Lachnoclostridium	cis-8,11,14-Eicosatrienoic.acid	0.284758	0.457678
Bilophila	cis-8,11,14-Eicosatrienoic.acid	0.355857	0.347263
Incertae_Sedis	cis-8,11,14-Eicosatrienoic.acid	0.0955237	0.806874
Parasutterella	cis-8,11,14-Eicosatrienoic.acid	0.331971	0.382784
Escherichia-Shigella	Suberic.acid	-0.575202	0.105147
Clostridia_vadinBB60_group	Suberic.acid	0.28822	0.451985
Bacteroides	Suberic.acid	0.714808	0.030447
Rikenellaceae_RC9_gut_group	Suberic.acid	0.466441	0.205635
Parabacteroides	Suberic.acid	0.716069	0.0300195
Alistipes	Suberic.acid	0.760397	0.0173785
Lachnospiraceae_NK4A136_group	Suberic.acid	0.195666	0.613892
[Eubacterium]_xylanophilum_group	Suberic.acid	0.153335	0.693683
Clostridium_sensu_stricto_1	Suberic.acid	-0.516722	0.154338
Candidatus_Saccharimonas	Suberic.acid	0.154038	0.692336
Enterococcus	Suberic.acid	-0.507594	0.16303
Clostridia_UCG-014	Suberic.acid	0.205344	0.596098
Butyricimonas	Suberic.acid	0.60579	0.0838103
Alloprevotella	Suberic.acid	0.849095	0.00378006
NK4A214_group	Suberic.acid	0.0364361	0.925855
Enterorhabdus	Suberic.acid	0.189596	0.625143
Lachnoclostridium	Suberic.acid	0.0776932	0.842519
Bilophila	Suberic.acid	0.0163997	0.966598
Incertae_Sedis	Suberic.acid	-0.0683431	0.861313
Parasutterella	Suberic.acid	0.567737	0.110807
Escherichia-Shigella	Glycyl-L-leucine	0.834003	0.00519558
Clostridia_vadinBB60_group	Glycyl-L-leucine	-0.784541	0.012293
Bacteroides	Glycyl-L-leucine	-0.536806	0.136182
Rikenellaceae_RC9_gut_group	Glycyl-L-leucine	-0.837328	0.00485701
Parabacteroides	Glycyl-L-leucine	-0.585333	0.0977522
Alistipes	Glycyl-L-leucine	-0.764008	0.0165423
Lachnospiraceae_NK4A136_group	Glycyl-L-leucine	-0.601094	0.0868941
[Eubacterium]_xylanophilum_group	Glycyl-L-leucine	-0.62476	0.072044
Clostridium_sensu_stricto_1	Glycyl-L-leucine	0.705164	0.0338501
Candidatus_Saccharimonas	Glycyl-L-leucine	-0.843157	0.00430047
Enterococcus	Glycyl-L-leucine	0.772608	0.0146597
Clostridia_UCG-014	Glycyl-L-leucine	-0.618555	0.0757713
Butyricimonas	Glycyl-L-leucine	-0.785471	0.01212
Alloprevotella	Glycyl-L-leucine	-0.712469	0.031251
NK4A214_group	Glycyl-L-leucine	-0.69256	0.0386573
Enterorhabdus	Glycyl-L-leucine	-0.773272	0.0145206
Lachnoclostridium	Glycyl-L-leucine	-0.603098	0.08557
Bilophila	Glycyl-L-leucine	-0.453434	0.220262
Incertae_Sedis	Glycyl-L-leucine	-0.724275	0.0273318
Parasutterella	Glycyl-L-leucine	-0.716957	0.0297204
Escherichia-Shigella	2-Dehydro-3-deoxy-D-gluconate	0.860127	0.00293104
Clostridia_vadinBB60_group	2-Dehydro-3-deoxy-D-gluconate	-0.821013	0.0066729
Bacteroides	2-Dehydro-3-deoxy-D-gluconate	-0.65604	0.0550071
Rikenellaceae_RC9_gut_group	2-Dehydro-3-deoxy-D-gluconate	-0.778878	0.0133814
Parabacteroides	2-Dehydro-3-deoxy-D-gluconate	-0.663864	0.0511916
Alistipes	2-Dehydro-3-deoxy-D-gluconate	-0.702235	0.0349302
Lachnospiraceae_NK4A136_group	2-Dehydro-3-deoxy-D-gluconate	-0.748901	0.020227
[Eubacterium]_xylanophilum_group	2-Dehydro-3-deoxy-D-gluconate	-0.756531	0.0183045
Clostridium_sensu_stricto_1	2-Dehydro-3-deoxy-D-gluconate	0.583284	0.0992214
Candidatus_Saccharimonas	2-Dehydro-3-deoxy-D-gluconate	-0.800371	0.00956922
Enterococcus	2-Dehydro-3-deoxy-D-gluconate	0.572843	0.106916
Clostridia_UCG-014	2-Dehydro-3-deoxy-D-gluconate	-0.725566	0.026924
Butyricimonas	2-Dehydro-3-deoxy-D-gluconate	-0.690566	0.039456
Alloprevotella	2-Dehydro-3-deoxy-D-gluconate	-0.623323	0.072897
NK4A214_group	2-Dehydro-3-deoxy-D-gluconate	-0.762667	0.0168496
Enterorhabdus	2-Dehydro-3-deoxy-D-gluconate	-0.722492	0.0279017
Lachnoclostridium	2-Dehydro-3-deoxy-D-gluconate	-0.693696	0.0382071
Bilophila	2-Dehydro-3-deoxy-D-gluconate	-0.649775	0.0581893
Incertae_Sedis	2-Dehydro-3-deoxy-D-gluconate	-0.738848	0.0229579
Parasutterella	2-Dehydro-3-deoxy-D-gluconate	-0.611969	0.0798562
Escherichia-Shigella	Taurocholate	0.895601	0.00109157
Clostridia_vadinBB60_group	Taurocholate	-0.709988	0.0321183
Bacteroides	Taurocholate	-0.647107	0.059579
Rikenellaceae_RC9_gut_group	Taurocholate	-0.674184	0.0464235
Parabacteroides	Taurocholate	-0.633696	0.0668809
Alistipes	Taurocholate	-0.630852	0.0684983
Lachnospiraceae_NK4A136_group	Taurocholate	-0.679655	0.0440152
[Eubacterium]_xylanophilum_group	Taurocholate	-0.672826	0.0470336
Clostridium_sensu_stricto_1	Taurocholate	0.755487	0.0185599
Candidatus_Saccharimonas	Taurocholate	-0.657938	0.0540657
Enterococcus	Taurocholate	0.675645	0.045772
Clostridia_UCG-014	Taurocholate	-0.644367	0.0610279
Butyricimonas	Taurocholate	-0.593254	0.0921976
Alloprevotella	Taurocholate	-0.567959	0.110636
NK4A214_group	Taurocholate	-0.648781	0.0587046
Enterorhabdus	Taurocholate	-0.605644	0.0839051
Lachnoclostridium	Taurocholate	-0.595621	0.0905762
Bilophila	Taurocholate	-0.594031	0.091663
Incertae_Sedis	Taurocholate	-0.579707	0.101818
Parasutterella	Taurocholate	-0.525957	0.145825
Escherichia-Shigella	N-Acetylcadaverine	0.817765	0.00708246
Clostridia_vadinBB60_group	N-Acetylcadaverine	-0.706946	0.0332034
Bacteroides	N-Acetylcadaverine	-0.709519	0.0322843
Rikenellaceae_RC9_gut_group	N-Acetylcadaverine	-0.677737	0.04485
Parabacteroides	N-Acetylcadaverine	-0.70411	0.0342362
Alistipes	N-Acetylcadaverine	-0.69293	0.0385103
Lachnospiraceae_NK4A136_group	N-Acetylcadaverine	-0.663166	0.051525
[Eubacterium]_xylanophilum_group	N-Acetylcadaverine	-0.658903	0.0535911
Clostridium_sensu_stricto_1	N-Acetylcadaverine	0.584294	0.0984952
Candidatus_Saccharimonas	N-Acetylcadaverine	-0.619047	0.0754716
Enterococcus	N-Acetylcadaverine	0.471041	0.200595
Clostridia_UCG-014	N-Acetylcadaverine	-0.617912	0.0761644
Butyricimonas	N-Acetylcadaverine	-0.643133	0.0616874
Alloprevotella	N-Acetylcadaverine	-0.637154	0.0649469
NK4A214_group	N-Acetylcadaverine	-0.601839	0.0864006
Enterorhabdus	N-Acetylcadaverine	-0.597971	0.0889837
Lachnoclostridium	N-Acetylcadaverine	-0.578986	0.102347
Bilophila	N-Acetylcadaverine	-0.5615	0.115673
Incertae_Sedis	N-Acetylcadaverine	-0.537197	0.135843
Parasutterella	N-Acetylcadaverine	-0.583824	0.098833
Escherichia-Shigella	Mannobiose	0.826838	0.00597932
Clostridia_vadinBB60_group	Mannobiose	-0.721922	0.0280856
Bacteroides	Mannobiose	-0.690752	0.039381
Rikenellaceae_RC9_gut_group	Mannobiose	-0.692097	0.0388416
Parabacteroides	Mannobiose	-0.680821	0.0435126
Alistipes	Mannobiose	-0.679079	0.044265
Lachnospiraceae_NK4A136_group	Mannobiose	-0.680151	0.0438011
[Eubacterium]_xylanophilum_group	Mannobiose	-0.674679	0.0462021
Clostridium_sensu_stricto_1	Mannobiose	0.662732	0.0517332
Candidatus_Saccharimonas	Mannobiose	-0.654844	0.055606
Enterococcus	Mannobiose	0.515952	0.15506
Clostridia_UCG-014	Mannobiose	-0.643971	0.0612388
Butyricimonas	Mannobiose	-0.634362	0.0665057
Alloprevotella	Mannobiose	-0.621108	0.0742237
NK4A214_group	Mannobiose	-0.637136	0.0649574
Enterorhabdus	Mannobiose	-0.61892	0.0755486
Lachnoclostridium	Mannobiose	-0.596422	0.090031
Bilophila	Mannobiose	-0.582738	0.0996149
Incertae_Sedis	Mannobiose	-0.570687	0.108549
Parasutterella	Mannobiose	-0.567587	0.110923
Escherichia-Shigella	Histamine	0.782232	0.0127292
Clostridia_vadinBB60_group	Histamine	-0.813302	0.0076727
Bacteroides	Histamine	-0.786835	0.0118695
Rikenellaceae_RC9_gut_group	Histamine	-0.782706	0.0126388
Parabacteroides	Histamine	-0.778322	0.0134915
Alistipes	Histamine	-0.77848	0.0134602
Lachnospiraceae_NK4A136_group	Histamine	-0.761593	0.0170986
[Eubacterium]_xylanophilum_group	Histamine	-0.755446	0.0185701
Clostridium_sensu_stricto_1	Histamine	0.589027	0.095137
Candidatus_Saccharimonas	Histamine	-0.738673	0.0230075
Enterococcus	Histamine	0.482463	0.188383
Clostridia_UCG-014	Histamine	-0.728273	0.0260819
Butyricimonas	Histamine	-0.725163	0.0270509
Alloprevotella	Histamine	-0.717343	0.0295912
NK4A214_group	Histamine	-0.714305	0.0306187
Enterorhabdus	Histamine	-0.679525	0.0440716
Lachnoclostridium	Histamine	-0.670029	0.0483074
Bilophila	Histamine	-0.648392	0.0589072
Incertae_Sedis	Histamine	-0.654828	0.0556141
Parasutterella	Histamine	-0.644784	0.0608058
Escherichia-Shigella	Rutin	0.855875	0.00324074
Clostridia_vadinBB60_group	Rutin	-0.705594	0.0336931
Bacteroides	Rutin	-0.678169	0.044661
Rikenellaceae_RC9_gut_group	Rutin	-0.67905	0.0442773
Parabacteroides	Rutin	-0.67661	0.0453454
Alistipes	Rutin	-0.675845	0.0456836
Lachnospiraceae_NK4A136_group	Rutin	-0.66069	0.0527185
[Eubacterium]_xylanophilum_group	Rutin	-0.6554	0.0553271
Clostridium_sensu_stricto_1	Rutin	0.557754	0.118656
Candidatus_Saccharimonas	Rutin	-0.640848	0.0629206
Enterococcus	Rutin	0.60147	0.0866448
Clostridia_UCG-014	Rutin	-0.631887	0.0679069
Butyricimonas	Rutin	-0.629852	0.0690724
Alloprevotella	Rutin	-0.622344	0.0734815
NK4A214_group	Rutin	-0.619708	0.0750699
Enterorhabdus	Rutin	-0.582493	0.0997919
Lachnoclostridium	Rutin	-0.581955	0.100181
Bilophila	Rutin	-0.562523	0.114866
Incertae_Sedis	Rutin	-0.566397	0.111841
Parasutterella	Rutin	-0.559292	0.117426
Escherichia-Shigella	N-Formimino-L-glutamate	0.880172	0.00174093
Clostridia_vadinBB60_group	N-Formimino-L-glutamate	-0.752224	0.0193741
Bacteroides	N-Formimino-L-glutamate	-0.723876	0.0274586
Rikenellaceae_RC9_gut_group	N-Formimino-L-glutamate	-0.723926	0.027443
Parabacteroides	N-Formimino-L-glutamate	-0.721291	0.0282901
Alistipes	N-Formimino-L-glutamate	-0.720497	0.0285487
Lachnospiraceae_NK4A136_group	N-Formimino-L-glutamate	-0.704363	0.0341434
[Eubacterium]_xylanophilum_group	N-Formimino-L-glutamate	-0.698713	0.0362589
Clostridium_sensu_stricto_1	N-Formimino-L-glutamate	0.592465	0.0927417
Candidatus_Saccharimonas	N-Formimino-L-glutamate	-0.683199	0.0424992
Enterococcus	N-Formimino-L-glutamate	0.630798	0.068529
Clostridia_UCG-014	N-Formimino-L-glutamate	-0.673644	0.0466655
Butyricimonas	N-Formimino-L-glutamate	-0.671459	0.0476536
Alloprevotella	N-Formimino-L-glutamate	-0.663471	0.0513791
NK4A214_group	N-Formimino-L-glutamate	-0.660661	0.0527325
Enterorhabdus	N-Formimino-L-glutamate	-0.620199	0.0747726
Lachnoclostridium	N-Formimino-L-glutamate	-0.620398	0.0746519
Bilophila	N-Formimino-L-glutamate	-0.599698	0.0878246
Incertae_Sedis	N-Formimino-L-glutamate	-0.604557	0.0846136
Parasutterella	N-Formimino-L-glutamate	-0.596289	0.0901217
Escherichia-Shigella	D-Glucuronate	0.926268	0.000333259
Clostridia_vadinBB60_group	D-Glucuronate	-0.717545	0.0295237
Bacteroides	D-Glucuronate	-0.693759	0.0381822
Rikenellaceae_RC9_gut_group	D-Glucuronate	-0.690552	0.0394618
Parabacteroides	D-Glucuronate	-0.68724	0.0408116
Alistipes	D-Glucuronate	-0.687011	0.0409062
Lachnospiraceae_NK4A136_group	D-Glucuronate	-0.671978	0.0474177
[Eubacterium]_xylanophilum_group	D-Glucuronate	-0.666501	0.049945
Clostridium_sensu_stricto_1	D-Glucuronate	0.755349	0.018594
Candidatus_Saccharimonas	D-Glucuronate	-0.651702	0.0571983
Enterococcus	D-Glucuronate	0.725724	0.0268743
Clostridia_UCG-014	D-Glucuronate	-0.642552	0.0619996
Butyricimonas	D-Glucuronate	-0.640079	0.0633391
Alloprevotella	D-Glucuronate	-0.632884	0.0673399
NK4A214_group	D-Glucuronate	-0.630204	0.06887
Enterorhabdus	D-Glucuronate	-0.607171	0.0829162
Lachnoclostridium	D-Glucuronate	-0.59141	0.0934726
Bilophila	D-Glucuronate	-0.572051	0.107514
Incertae_Sedis	D-Glucuronate	-0.560625	0.116366
Parasutterella	D-Glucuronate	-0.568534	0.110194
Escherichia-Shigella	Dihydrocaffeic.acid	0.521149	0.150222
Clostridia_vadinBB60_group	Dihydrocaffeic.acid	-0.506469	0.16412
Bacteroides	Dihydrocaffeic.acid	-0.490472	0.180076
Rikenellaceae_RC9_gut_group	Dihydrocaffeic.acid	-0.487416	0.183221
Parabacteroides	Dihydrocaffeic.acid	-0.482623	0.188215
Alistipes	Dihydrocaffeic.acid	-0.484086	0.186683
Lachnospiraceae_NK4A136_group	Dihydrocaffeic.acid	-0.474277	0.197091
[Eubacterium]_xylanophilum_group	Dihydrocaffeic.acid	-0.47044	0.20125
Clostridium_sensu_stricto_1	Dihydrocaffeic.acid	0.384157	0.307368
Candidatus_Saccharimonas	Dihydrocaffeic.acid	-0.459995	0.212815
Enterococcus	Dihydrocaffeic.acid	0.15821	0.684344
Clostridia_UCG-014	Dihydrocaffeic.acid	-0.453425	0.220272
Butyricimonas	Dihydrocaffeic.acid	-0.450485	0.223656
Alloprevotella	Dihydrocaffeic.acid	-0.446712	0.228038
NK4A214_group	Dihydrocaffeic.acid	-0.44482	0.230253
Enterorhabdus	Dihydrocaffeic.acid	-0.445958	0.22892
Lachnoclostridium	Dihydrocaffeic.acid	-0.416249	0.265115
Bilophila	Dihydrocaffeic.acid	-0.403774	0.281156
Incertae_Sedis	Dihydrocaffeic.acid	-0.39842	0.288191
Parasutterella	Dihydrocaffeic.acid	-0.401284	0.284416
Escherichia-Shigella	Indolelactic.acid	0.826201	0.00605264
Clostridia_vadinBB60_group	Indolelactic.acid	-0.694641	0.0378349
Bacteroides	Indolelactic.acid	-0.666892	0.0497619
Rikenellaceae_RC9_gut_group	Indolelactic.acid	-0.668509	0.0490085
Parabacteroides	Indolelactic.acid	-0.666159	0.0501054
Alistipes	Indolelactic.acid	-0.665371	0.0504767
Lachnospiraceae_NK4A136_group	Indolelactic.acid	-0.650414	0.0578594
[Eubacterium]_xylanophilum_group	Indolelactic.acid	-0.645226	0.060571
Clostridium_sensu_stricto_1	Indolelactic.acid	0.506723	0.163874
Candidatus_Saccharimonas	Indolelactic.acid	-0.6309	0.0684706
Enterococcus	Indolelactic.acid	0.555106	0.120793
Clostridia_UCG-014	Indolelactic.acid	-0.62208	0.0736394
Butyricimonas	Indolelactic.acid	-0.620103	0.0748305
Alloprevotella	Indolelactic.acid	-0.612683	0.0794069
NK4A214_group	Indolelactic.acid	-0.610088	0.0810473
Enterorhabdus	Indolelactic.acid	-0.571367	0.108032
Lachnoclostridium	Indolelactic.acid	-0.572947	0.106838
Bilophila	Indolelactic.acid	-0.553791	0.121862
Incertae_Sedis	Indolelactic.acid	-0.560659	0.116339
Parasutterella	Indolelactic.acid	-0.550654	0.124436
Escherichia-Shigella	(S)-Lactate	0.795882	0.0102954
Clostridia_vadinBB60_group	(S)-Lactate	-0.699012	0.0361447
Bacteroides	(S)-Lactate	-0.670908	0.0479047
Rikenellaceae_RC9_gut_group	(S)-Lactate	-0.672716	0.0470836
Parabacteroides	(S)-Lactate	-0.669886	0.0483731
Alistipes	(S)-Lactate	-0.669401	0.0485965
Lachnospiraceae_NK4A136_group	(S)-Lactate	-0.654492	0.0557831
[Eubacterium]_xylanophilum_group	(S)-Lactate	-0.649286	0.0584424
Clostridium_sensu_stricto_1	(S)-Lactate	0.459401	0.213483
Candidatus_Saccharimonas	(S)-Lactate	-0.63487	0.0662205
Enterococcus	(S)-Lactate	0.46953	0.202243
Clostridia_UCG-014	(S)-Lactate	-0.625973	0.0713287
Butyricimonas	(S)-Lactate	-0.623757	0.0726383
Alloprevotella	(S)-Lactate	-0.616538	0.0770081
NK4A214_group	(S)-Lactate	-0.613927	0.0786279
Enterorhabdus	(S)-Lactate	-0.577389	0.103523
Lachnoclostridium	(S)-Lactate	-0.576327	0.10431
Bilophila	(S)-Lactate	-0.557276	0.119041
Incertae_Sedis	(S)-Lactate	-0.566244	0.11196
Parasutterella	(S)-Lactate	-0.55414	0.121578

## Sheet: Cor. coef Fig. 6b
genus	altered plasma metabolites	cor	pvalue
Escherichia-Shigella	Chenodeoxycholate	-0.91283	0.000590787
Clostridia_vadinBB60_group	Chenodeoxycholate	0.930531	0.000271711
Bacteroides	Chenodeoxycholate	0.807512	0.00848693
Rikenellaceae_RC9_gut_group	Chenodeoxycholate	0.902758	0.0008575
Parabacteroides	Chenodeoxycholate	0.782517	0.0126748
Alistipes	Chenodeoxycholate	0.812508	0.00778104
Lachnospiraceae_NK4A136_group	Chenodeoxycholate	0.887946	0.00138755
[Eubacterium]_xylanophilum_group	Chenodeoxycholate	0.86915	0.00234238
Clostridium_sensu_stricto_1	Chenodeoxycholate	-0.834964	0.00509615
Candidatus_Saccharimonas	Chenodeoxycholate	0.933548	0.000233302
Enterococcus	Chenodeoxycholate	-0.813647	0.00762591
Clostridia_UCG-014	Chenodeoxycholate	0.911801	0.000614917
Butyricimonas	Chenodeoxycholate	0.756208	0.0183831
Alloprevotella	Chenodeoxycholate	0.753214	0.0191246
NK4A214_group	Chenodeoxycholate	0.90502	0.000791499
Enterorhabdus	Chenodeoxycholate	0.764557	0.0164175
Lachnoclostridium	Chenodeoxycholate	0.78409	0.0123775
Bilophila	Chenodeoxycholate	0.778085	0.0135386
Incertae_Sedis	Chenodeoxycholate	0.836203	0.00496981
Parasutterella	Chenodeoxycholate	0.618301	0.0759262
Escherichia-Shigella	2-Oxoadipic.acid	-0.719443	0.0288944
Clostridia_vadinBB60_group	2-Oxoadipic.acid	0.699487	0.0359642
Bacteroides	2-Oxoadipic.acid	0.901283	0.000902552
Rikenellaceae_RC9_gut_group	2-Oxoadipic.acid	0.502364	0.168134
Parabacteroides	2-Oxoadipic.acid	0.967167	2.04504e-05
Alistipes	2-Oxoadipic.acid	0.843325	0.00428507
Lachnospiraceae_NK4A136_group	2-Oxoadipic.acid	0.555393	0.12056
[Eubacterium]_xylanophilum_group	2-Oxoadipic.acid	0.634496	0.0664303
Clostridium_sensu_stricto_1	2-Oxoadipic.acid	-0.657905	0.0540821
Candidatus_Saccharimonas	2-Oxoadipic.acid	0.422796	0.256895
Enterococcus	2-Oxoadipic.acid	-0.643803	0.0613288
Clostridia_UCG-014	2-Oxoadipic.acid	0.502207	0.168288
Butyricimonas	2-Oxoadipic.acid	0.817568	0.00710791
Alloprevotella	2-Oxoadipic.acid	0.767356	0.0157913
NK4A214_group	2-Oxoadipic.acid	0.414366	0.267504
Enterorhabdus	2-Oxoadipic.acid	0.6391	0.0638747
Lachnoclostridium	2-Oxoadipic.acid	0.634109	0.0666483
Bilophila	2-Oxoadipic.acid	0.437063	0.239457
Incertae_Sedis	2-Oxoadipic.acid	0.372966	0.322855
Parasutterella	2-Oxoadipic.acid	0.758312	0.0178738
Escherichia-Shigella	Trimethylamine.N-oxide	-0.900431	0.000929319
Clostridia_vadinBB60_group	Trimethylamine.N-oxide	0.82966	0.00566168
Bacteroides	Trimethylamine.N-oxide	0.923469	0.000378622
Rikenellaceae_RC9_gut_group	Trimethylamine.N-oxide	0.85387	0.00339432
Parabacteroides	Trimethylamine.N-oxide	0.933922	0.000228826
Alistipes	Trimethylamine.N-oxide	0.971718	1.21845e-05
Lachnospiraceae_NK4A136_group	Trimethylamine.N-oxide	0.713523	0.030887
[Eubacterium]_xylanophilum_group	Trimethylamine.N-oxide	0.709688	0.0322243
Clostridium_sensu_stricto_1	Trimethylamine.N-oxide	-0.823527	0.00636726
Candidatus_Saccharimonas	Trimethylamine.N-oxide	0.730761	0.0253231
Enterococcus	Trimethylamine.N-oxide	-0.803148	0.00913789
Clostridia_UCG-014	Trimethylamine.N-oxide	0.70939	0.0323299
Butyricimonas	Trimethylamine.N-oxide	0.889068	0.00134103
Alloprevotella	Trimethylamine.N-oxide	0.948019	0.000100192
NK4A214_group	Trimethylamine.N-oxide	0.645405	0.060476
Enterorhabdus	Trimethylamine.N-oxide	0.701637	0.0351536
Lachnoclostridium	Trimethylamine.N-oxide	0.6341	0.0666531
Bilophila	Trimethylamine.N-oxide	0.544287	0.129759
Incertae_Sedis	Trimethylamine.N-oxide	0.574404	0.105744
Parasutterella	Trimethylamine.N-oxide	0.794604	0.0105085
Escherichia-Shigella	Pantothenate	-0.747478	0.0205998
Clostridia_vadinBB60_group	Pantothenate	0.908307	0.000702031
Bacteroides	Pantothenate	0.618324	0.0759122
Rikenellaceae_RC9_gut_group	Pantothenate	0.730474	0.0254098
Parabacteroides	Pantothenate	0.597101	0.0895711
Alistipes	Pantothenate	0.522841	0.148666
Lachnospiraceae_NK4A136_group	Pantothenate	0.930576	0.00027111
[Eubacterium]_xylanophilum_group	Pantothenate	0.950488	8.47064e-05
Clostridium_sensu_stricto_1	Pantothenate	-0.683771	0.0422577
Candidatus_Saccharimonas	Pantothenate	0.833563	0.00524163
Enterococcus	Pantothenate	-0.669972	0.0483336
Clostridia_UCG-014	Pantothenate	0.79851	0.00986598
Butyricimonas	Pantothenate	0.558401	0.118138
Alloprevotella	Pantothenate	0.351565	0.353524
NK4A214_group	Pantothenate	0.912695	0.000593913
Enterorhabdus	Pantothenate	0.76856	0.0155269
Lachnoclostridium	Pantothenate	0.856905	0.0031638
Bilophila	Pantothenate	0.905974	0.000764763
Incertae_Sedis	Pantothenate	0.883212	0.00159609
Parasutterella	Pantothenate	0.527056	0.14483
Escherichia-Shigella	Palmitic.acid	-0.722928	0.0277618
Clostridia_vadinBB60_group	Palmitic.acid	0.681806	0.0430907
Bacteroides	Palmitic.acid	0.485384	0.185329
Rikenellaceae_RC9_gut_group	Palmitic.acid	0.741047	0.0223409
Parabacteroides	Palmitic.acid	0.418183	0.262672
Alistipes	Palmitic.acid	0.50904	0.161634
Lachnospiraceae_NK4A136_group	Palmitic.acid	0.708713	0.0325704
[Eubacterium]_xylanophilum_group	Palmitic.acid	0.640285	0.0632269
Clostridium_sensu_stricto_1	Palmitic.acid	-0.617941	0.0761465
Candidatus_Saccharimonas	Palmitic.acid	0.860259	0.00292179
Enterococcus	Palmitic.acid	-0.591754	0.0932341
Clostridia_UCG-014	Palmitic.acid	0.852519	0.00350057
Butyricimonas	Palmitic.acid	0.430374	0.247551
Alloprevotella	Palmitic.acid	0.516393	0.154647
NK4A214_group	Palmitic.acid	0.830982	0.00551686
Enterorhabdus	Palmitic.acid	0.510393	0.160335
Lachnoclostridium	Palmitic.acid	0.567081	0.111313
Bilophila	Palmitic.acid	0.646813	0.0597332
Incertae_Sedis	Palmitic.acid	0.754805	0.0187283
Parasutterella	Palmitic.acid	0.232943	0.54639
Escherichia-Shigella	Leupeptin	-0.684799	0.0418256
Clostridia_vadinBB60_group	Leupeptin	0.784876	0.0122305
Bacteroides	Leupeptin	0.443953	0.231272
Rikenellaceae_RC9_gut_group	Leupeptin	0.836054	0.00498495
Parabacteroides	Leupeptin	0.384826	0.306455
Alistipes	Leupeptin	0.479181	0.191848
Lachnospiraceae_NK4A136_group	Leupeptin	0.81634	0.00726752
[Eubacterium]_xylanophilum_group	Leupeptin	0.765156	0.0162821
Clostridium_sensu_stricto_1	Leupeptin	-0.63678	0.0651544
Candidatus_Saccharimonas	Leupeptin	0.899656	0.000954148
Enterococcus	Leupeptin	-0.596004	0.0903154
Clostridia_UCG-014	Leupeptin	0.77372	0.0144272
Butyricimonas	Leupeptin	0.467165	0.204838
Alloprevotella	Leupeptin	0.395632	0.29189
NK4A214_group	Leupeptin	0.887159	0.00142083
Enterorhabdus	Leupeptin	0.63855	0.0641764
Lachnoclostridium	Leupeptin	0.642397	0.0620827
Bilophila	Leupeptin	0.75827	0.0178841
Incertae_Sedis	Leupeptin	0.849513	0.00374514
Parasutterella	Leupeptin	0.406843	0.277163
Escherichia-Shigella	N-benzoyl.glycine	-0.947987	0.000100406
Clostridia_vadinBB60_group	N-benzoyl.glycine	0.916817	0.000503499
Bacteroides	N-benzoyl.glycine	0.895896	0.00108111
Rikenellaceae_RC9_gut_group	N-benzoyl.glycine	0.920825	0.000425279
Parabacteroides	N-benzoyl.glycine	0.879004	0.00179894
Alistipes	N-benzoyl.glycine	0.901279	0.000902678
Lachnospiraceae_NK4A136_group	N-benzoyl.glycine	0.858164	0.00307139
[Eubacterium]_xylanophilum_group	N-benzoyl.glycine	0.840268	0.00457052
Clostridium_sensu_stricto_1	N-benzoyl.glycine	-0.864754	0.00261783
Candidatus_Saccharimonas	N-benzoyl.glycine	0.8455	0.00408961
Enterococcus	N-benzoyl.glycine	-0.820525	0.00673346
Clostridia_UCG-014	N-benzoyl.glycine	0.817685	0.00709277
Butyricimonas	N-benzoyl.glycine	0.831904	0.00541749
Alloprevotella	N-benzoyl.glycine	0.841312	0.00447165
NK4A214_group	N-benzoyl.glycine	0.803187	0.00913202
Enterorhabdus	N-benzoyl.glycine	0.755811	0.0184804
Lachnoclostridium	N-benzoyl.glycine	0.732421	0.024825
Bilophila	N-benzoyl.glycine	0.718769	0.0291167
Incertae_Sedis	N-benzoyl.glycine	0.72399	0.0274225
Parasutterella	N-benzoyl.glycine	0.746305	0.0209102
Escherichia-Shigella	Chenodeoxycholic.acid	-0.866535	0.00250371
Clostridia_vadinBB60_group	Chenodeoxycholic.acid	0.861013	0.00286919
Bacteroides	Chenodeoxycholic.acid	0.940667	0.000158031
Rikenellaceae_RC9_gut_group	Chenodeoxycholic.acid	0.77595	0.0139686
Parabacteroides	Chenodeoxycholic.acid	0.910707	0.000641335
Alistipes	Chenodeoxycholic.acid	0.831684	0.0054411
Lachnospiraceae_NK4A136_group	Chenodeoxycholic.acid	0.85176	0.00356127
[Eubacterium]_xylanophilum_group	Chenodeoxycholic.acid	0.837702	0.00481997
Clostridium_sensu_stricto_1	Chenodeoxycholic.acid	-0.770901	0.0150212
Candidatus_Saccharimonas	Chenodeoxycholic.acid	0.739616	0.0227411
Enterococcus	Chenodeoxycholic.acid	-0.699182	0.0360798
Clostridia_UCG-014	Chenodeoxycholic.acid	0.839502	0.00464406
Butyricimonas	Chenodeoxycholic.acid	0.740264	0.0225593
Alloprevotella	Chenodeoxycholic.acid	0.775529	0.0140544
NK4A214_group	Chenodeoxycholic.acid	0.764097	0.0165221
Enterorhabdus	Chenodeoxycholic.acid	0.663804	0.0512204
Lachnoclostridium	Chenodeoxycholic.acid	0.742328	0.0219864
Bilophila	Chenodeoxycholic.acid	0.749195	0.0201506
Incertae_Sedis	Chenodeoxycholic.acid	0.655112	0.0554717
Parasutterella	Chenodeoxycholic.acid	0.616315	0.0771457
Escherichia-Shigella	3-Formylindole	-0.721141	0.028339
Clostridia_vadinBB60_group	3-Formylindole	0.708321	0.03271
Bacteroides	3-Formylindole	0.692155	0.0388188
Rikenellaceae_RC9_gut_group	3-Formylindole	0.72379	0.0274861
Parabacteroides	3-Formylindole	0.685976	0.041335
Alistipes	3-Formylindole	0.731921	0.0249743
Lachnospiraceae_NK4A136_group	3-Formylindole	0.639639	0.0635796
[Eubacterium]_xylanophilum_group	3-Formylindole	0.624562	0.0721611
Clostridium_sensu_stricto_1	3-Formylindole	-0.502936	0.167571
Candidatus_Saccharimonas	3-Formylindole	0.696907	0.0369525
Enterococcus	3-Formylindole	-0.382486	0.309656
Clostridia_UCG-014	3-Formylindole	0.679593	0.0440422
Butyricimonas	3-Formylindole	0.666759	0.049824
Alloprevotella	3-Formylindole	0.714278	0.0306279
NK4A214_group	3-Formylindole	0.63877	0.0640558
Enterorhabdus	3-Formylindole	0.597676	0.0891825
Lachnoclostridium	3-Formylindole	0.564146	0.113593
Bilophila	3-Formylindole	0.522348	0.149118
Incertae_Sedis	3-Formylindole	0.585162	0.0978745
Parasutterella	3-Formylindole	0.551762	0.123524
Escherichia-Shigella	Bilirubin	-0.49067	0.179873
Clostridia_vadinBB60_group	Bilirubin	0.318097	0.404162
Bacteroides	Bilirubin	0.315924	0.40756
Rikenellaceae_RC9_gut_group	Bilirubin	0.181496	0.640259
Parabacteroides	Bilirubin	0.437793	0.238583
Alistipes	Bilirubin	0.488612	0.181986
Lachnospiraceae_NK4A136_group	Bilirubin	0.0674033	0.863206
[Eubacterium]_xylanophilum_group	Bilirubin	0.173825	0.654682
Clostridium_sensu_stricto_1	Bilirubin	-0.252731	0.511764
Candidatus_Saccharimonas	Bilirubin	0.283253	0.460163
Enterococcus	Bilirubin	-0.209676	0.588194
Clostridia_UCG-014	Bilirubin	0.231408	0.549113
Butyricimonas	Bilirubin	0.531344	0.140989
Alloprevotella	Bilirubin	0.495747	0.174721
NK4A214_group	Bilirubin	0.162418	0.676311
Enterorhabdus	Bilirubin	0.448475	0.225985
Lachnoclostridium	Bilirubin	0.317924	0.404433
Bilophila	Bilirubin	-0.021173	0.956883
Incertae_Sedis	Bilirubin	0.222947	0.564211
Parasutterella	Bilirubin	0.397626	0.289241
Escherichia-Shigella	Indolelactic.acid	0.771628	0.0148665
Clostridia_vadinBB60_group	Indolelactic.acid	-0.65226	0.0569135
Bacteroides	Indolelactic.acid	-0.647735	0.05925
Rikenellaceae_RC9_gut_group	Indolelactic.acid	-0.670354	0.0481584
Parabacteroides	Indolelactic.acid	-0.63946	0.0636772
Alistipes	Indolelactic.acid	-0.668908	0.048824
Lachnospiraceae_NK4A136_group	Indolelactic.acid	-0.597186	0.0895138
[Eubacterium]_xylanophilum_group	Indolelactic.acid	-0.584245	0.0985304
Clostridium_sensu_stricto_1	Indolelactic.acid	0.827229	0.00593454
Candidatus_Saccharimonas	Indolelactic.acid	-0.606264	0.0835027
Enterococcus	Indolelactic.acid	0.950987	8.17997e-05
Clostridia_UCG-014	Indolelactic.acid	-0.575886	0.104637
Butyricimonas	Indolelactic.acid	-0.617211	0.076594
Alloprevotella	Indolelactic.acid	-0.632941	0.0673079
NK4A214_group	Indolelactic.acid	-0.561385	0.115764
Enterorhabdus	Indolelactic.acid	-0.530833	0.141443
Lachnoclostridium	Indolelactic.acid	-0.511133	0.159627
Bilophila	Indolelactic.acid	-0.487999	0.182619
Incertae_Sedis	Indolelactic.acid	-0.500648	0.169828
Parasutterella	Indolelactic.acid	-0.553165	0.122373
Escherichia-Shigella	9(10)-EpOME	0.766288	0.0160284
Clostridia_vadinBB60_group	9(10)-EpOME	-0.494789	0.175687
Bacteroides	9(10)-EpOME	-0.490907	0.179631
Rikenellaceae_RC9_gut_group	9(10)-EpOME	-0.50133	0.169154
Parabacteroides	9(10)-EpOME	-0.483446	0.187352
Alistipes	9(10)-EpOME	-0.497785	0.172677
Lachnospiraceae_NK4A136_group	9(10)-EpOME	-0.459795	0.213039
[Eubacterium]_xylanophilum_group	9(10)-EpOME	-0.449583	0.224699
Clostridium_sensu_stricto_1	9(10)-EpOME	0.747243	0.0206615
Candidatus_Saccharimonas	9(10)-EpOME	-0.456541	0.216718
Enterococcus	9(10)-EpOME	0.821736	0.00658402
Clostridia_UCG-014	9(10)-EpOME	-0.441495	0.234175
Butyricimonas	9(10)-EpOME	-0.458014	0.215049
Alloprevotella	9(10)-EpOME	-0.468344	0.203541
NK4A214_group	9(10)-EpOME	-0.429771	0.248287
Enterorhabdus	9(10)-EpOME	-0.412594	0.269763
Lachnoclostridium	9(10)-EpOME	-0.392463	0.296124
Bilophila	9(10)-EpOME	-0.381164	0.311473
Incertae_Sedis	9(10)-EpOME	-0.368086	0.329728
Parasutterella	9(10)-EpOME	-0.40887	0.274543
Escherichia-Shigella	Cholesteryl.sulfate	0.8393	0.00466351
Clostridia_vadinBB60_group	Cholesteryl.sulfate	-0.86989	0.00229809
Bacteroides	Cholesteryl.sulfate	-0.801341	0.00941711
Rikenellaceae_RC9_gut_group	Cholesteryl.sulfate	-0.813186	0.00768845
Parabacteroides	Cholesteryl.sulfate	-0.793675	0.0106656
Alistipes	Cholesteryl.sulfate	-0.783513	0.012486
Lachnospiraceae_NK4A136_group	Cholesteryl.sulfate	-0.823061	0.00642318
[Eubacterium]_xylanophilum_group	Cholesteryl.sulfate	-0.82192	0.00656152
Clostridium_sensu_stricto_1	Cholesteryl.sulfate	0.618389	0.0758727
Candidatus_Saccharimonas	Cholesteryl.sulfate	-0.793915	0.0106247
Enterococcus	Cholesteryl.sulfate	0.556146	0.119951
Clostridia_UCG-014	Cholesteryl.sulfate	-0.780337	0.0130951
Butyricimonas	Cholesteryl.sulfate	-0.741003	0.022353
Alloprevotella	Cholesteryl.sulfate	-0.704405	0.0341279
NK4A214_group	Cholesteryl.sulfate	-0.781937	0.0127857
Enterorhabdus	Cholesteryl.sulfate	-0.726715	0.0265643
Lachnoclostridium	Cholesteryl.sulfate	-0.734959	0.0240763
Bilophila	Cholesteryl.sulfate	-0.716934	0.0297282
Incertae_Sedis	Cholesteryl.sulfate	-0.726715	0.0265643
Parasutterella	Cholesteryl.sulfate	-0.658584	0.0537475
Escherichia-Shigella	L-Pyroglutamic.acid	0.767049	0.0158591
Clostridia_vadinBB60_group	L-Pyroglutamic.acid	-0.65057	0.0577794
Bacteroides	L-Pyroglutamic.acid	-0.586931	0.0966152
Rikenellaceae_RC9_gut_group	L-Pyroglutamic.acid	-0.645048	0.0606653
Parabacteroides	L-Pyroglutamic.acid	-0.542178	0.131551
Alistipes	L-Pyroglutamic.acid	-0.49899	0.171475
Lachnospiraceae_NK4A136_group	L-Pyroglutamic.acid	-0.700725	0.0354959
[Eubacterium]_xylanophilum_group	L-Pyroglutamic.acid	-0.671451	0.0476571
Clostridium_sensu_stricto_1	L-Pyroglutamic.acid	0.805746	0.00874651
Candidatus_Saccharimonas	L-Pyroglutamic.acid	-0.536773	0.136211
Enterococcus	L-Pyroglutamic.acid	0.87761	0.00186982
Clostridia_UCG-014	L-Pyroglutamic.acid	-0.509107	0.16157
Butyricimonas	L-Pyroglutamic.acid	-0.469541	0.202231
Alloprevotella	L-Pyroglutamic.acid	-0.391089	0.297969
NK4A214_group	L-Pyroglutamic.acid	-0.580121	0.101516
Enterorhabdus	L-Pyroglutamic.acid	-0.494703	0.175773
Lachnoclostridium	L-Pyroglutamic.acid	-0.522099	0.149348
Bilophila	L-Pyroglutamic.acid	-0.638246	0.064344
Incertae_Sedis	L-Pyroglutamic.acid	-0.499653	0.170816
Parasutterella	L-Pyroglutamic.acid	-0.51769	0.153432
Escherichia-Shigella	trans-4-Coumaric.acid	0.686061	0.0412996
Clostridia_vadinBB60_group	trans-4-Coumaric.acid	-0.796768	0.0101491
Bacteroides	trans-4-Coumaric.acid	-0.814552	0.00750411
Rikenellaceae_RC9_gut_group	trans-4-Coumaric.acid	-0.772516	0.0146791
Parabacteroides	trans-4-Coumaric.acid	-0.798671	0.00983994
Alistipes	trans-4-Coumaric.acid	-0.790936	0.0111372
Lachnospiraceae_NK4A136_group	trans-4-Coumaric.acid	-0.754053	0.018915
[Eubacterium]_xylanophilum_group	trans-4-Coumaric.acid	-0.739147	0.0228732
Clostridium_sensu_stricto_1	trans-4-Coumaric.acid	0.587122	0.0964804
Candidatus_Saccharimonas	trans-4-Coumaric.acid	-0.730228	0.0254845
Enterococcus	trans-4-Coumaric.acid	0.625276	0.0717395
Clostridia_UCG-014	trans-4-Coumaric.acid	-0.752823	0.0192228
Butyricimonas	trans-4-Coumaric.acid	-0.717578	0.0295128
Alloprevotella	trans-4-Coumaric.acid	-0.748213	0.0204065
NK4A214_group	trans-4-Coumaric.acid	-0.707703	0.0329311
Enterorhabdus	trans-4-Coumaric.acid	-0.621835	0.0737863
Lachnoclostridium	trans-4-Coumaric.acid	-0.656329	0.0548632
Bilophila	trans-4-Coumaric.acid	-0.639775	0.0635051
Incertae_Sedis	trans-4-Coumaric.acid	-0.643413	0.0615375
Parasutterella	trans-4-Coumaric.acid	-0.610142	0.0810128
Escherichia-Shigella	Sebacic.acid	0.658295	0.05389
Clostridia_vadinBB60_group	Sebacic.acid	-0.411259	0.271471
Bacteroides	Sebacic.acid	-0.401042	0.284733
Rikenellaceae_RC9_gut_group	Sebacic.acid	-0.395788	0.291682
Parabacteroides	Sebacic.acid	-0.395408	0.292188
Alistipes	Sebacic.acid	-0.394272	0.293702
Lachnospiraceae_NK4A136_group	Sebacic.acid	-0.385254	0.305871
[Eubacterium]_xylanophilum_group	Sebacic.acid	-0.382003	0.310319
Clostridium_sensu_stricto_1	Sebacic.acid	0.709419	0.0323195
Candidatus_Saccharimonas	Sebacic.acid	-0.373522	0.322077
Enterococcus	Sebacic.acid	0.809455	0.0082075
Clostridia_UCG-014	Sebacic.acid	-0.368345	0.32936
Butyricimonas	Sebacic.acid	-0.367667	0.330321
Alloprevotella	Sebacic.acid	-0.362736	0.337344
NK4A214_group	Sebacic.acid	-0.3612	0.339547
Enterorhabdus	Sebacic.acid	-0.343085	0.366051
Lachnoclostridium	Sebacic.acid	-0.339701	0.371108
Bilophila	Sebacic.acid	-0.32787	0.389047
Incertae_Sedis	Sebacic.acid	-0.307778	0.420409
Parasutterella	Sebacic.acid	-0.325719	0.392351
Escherichia-Shigella	Tetrahydrocorticosterone	0.568716	0.110054
Clostridia_vadinBB60_group	Tetrahydrocorticosterone	-0.741332	0.0222617
Bacteroides	Tetrahydrocorticosterone	-0.71886	0.0290869
Rikenellaceae_RC9_gut_group	Tetrahydrocorticosterone	-0.713443	0.0309143
Parabacteroides	Tetrahydrocorticosterone	-0.709872	0.0321593
Alistipes	Tetrahydrocorticosterone	-0.709735	0.0322078
Lachnospiraceae_NK4A136_group	Tetrahydrocorticosterone	-0.694198	0.038009
[Eubacterium]_xylanophilum_group	Tetrahydrocorticosterone	-0.688596	0.0402557
Clostridium_sensu_stricto_1	Tetrahydrocorticosterone	0.454653	0.218868
Candidatus_Saccharimonas	Tetrahydrocorticosterone	-0.673306	0.0468172
Enterococcus	Tetrahydrocorticosterone	0.372978	0.322838
Clostridia_UCG-014	Tetrahydrocorticosterone	-0.663846	0.0512004
Butyricimonas	Tetrahydrocorticosterone	-0.661218	0.0524626
Alloprevotella	Tetrahydrocorticosterone	-0.653865	0.0560993
NK4A214_group	Tetrahydrocorticosterone	-0.651095	0.0575093
Enterorhabdus	Tetrahydrocorticosterone	-0.608285	0.0821994
Lachnoclostridium	Tetrahydrocorticosterone	-0.610943	0.0805046
Bilophila	Tetrahydrocorticosterone	-0.591015	0.0937477
Incertae_Sedis	Tetrahydrocorticosterone	-0.60651	0.0833435
Parasutterella	Tetrahydrocorticosterone	-0.587974	0.0958778
